# Supplementary material for: Exploring the anti-obesity bioactive compounds of Thymelaea hirsuta and Ziziphus spina-christi through integration of lipase inhibition screening and molecular docking analysis
Source: Royal Society of Chemistry journal article supplement (doi:10.1039/d3ra05826c), 2023-01-01
Supplement: d3ra05826c2.pdf [file d3ra05826c2.pdf]

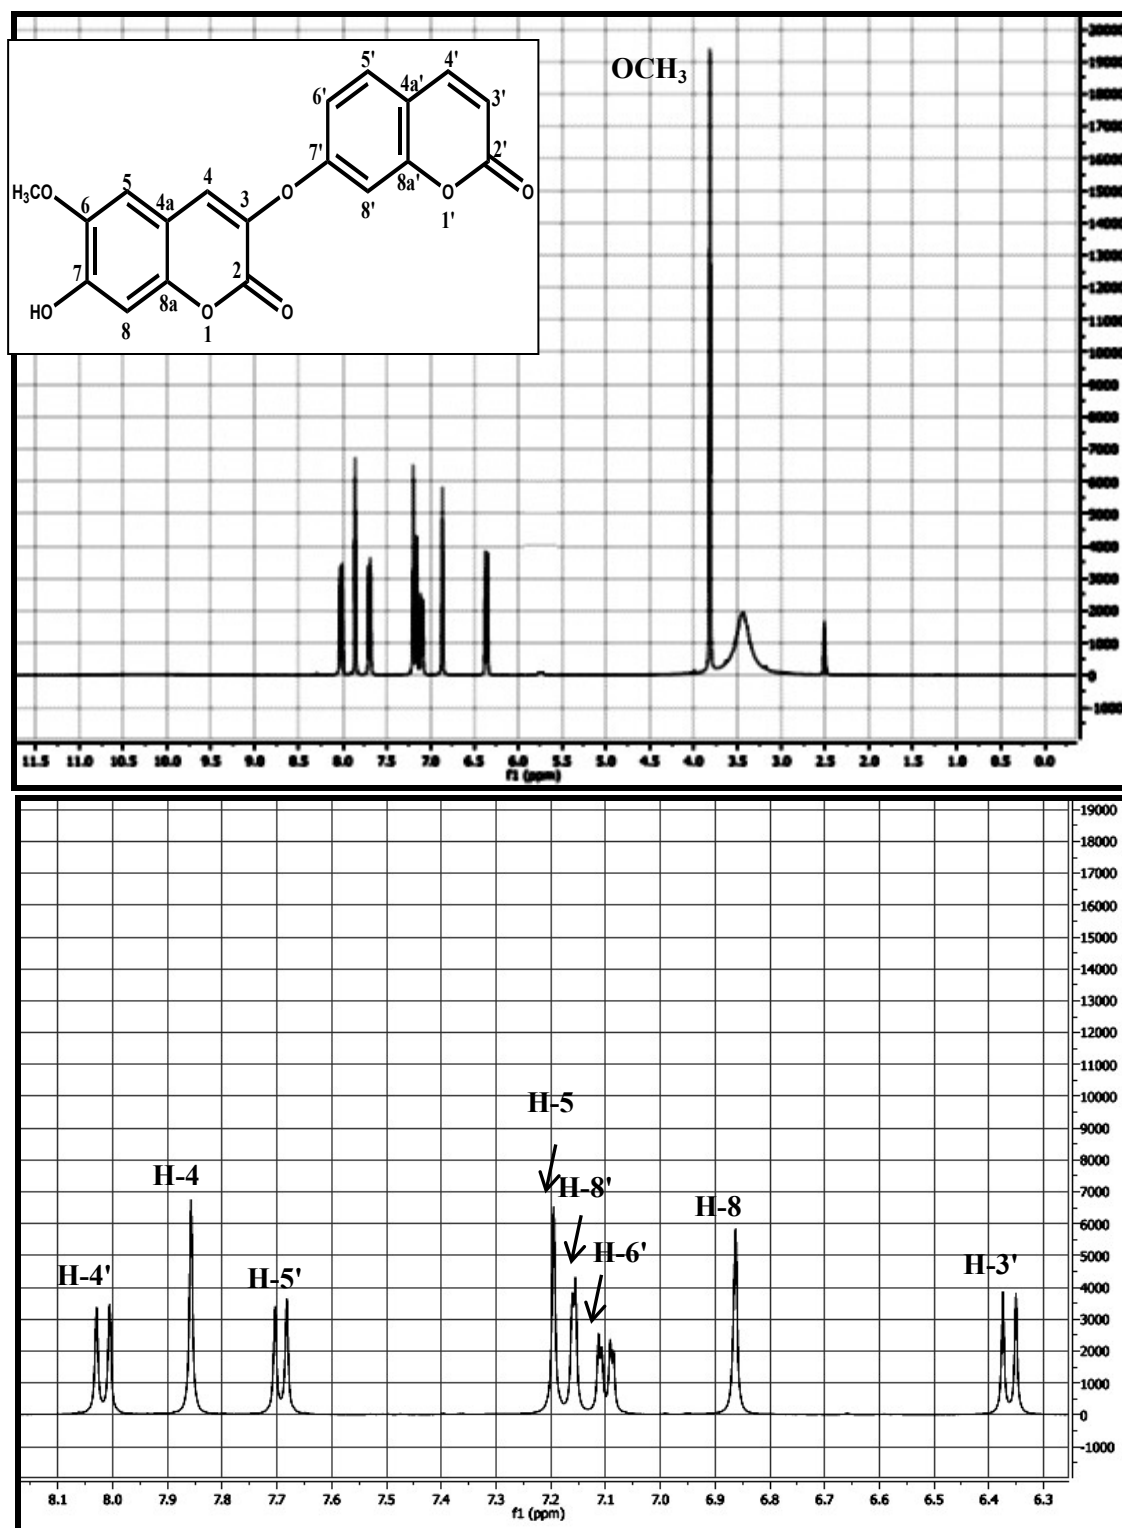

Figure S6: <sup>1</sup>H-NMR spectrum of daphnoretin (1)

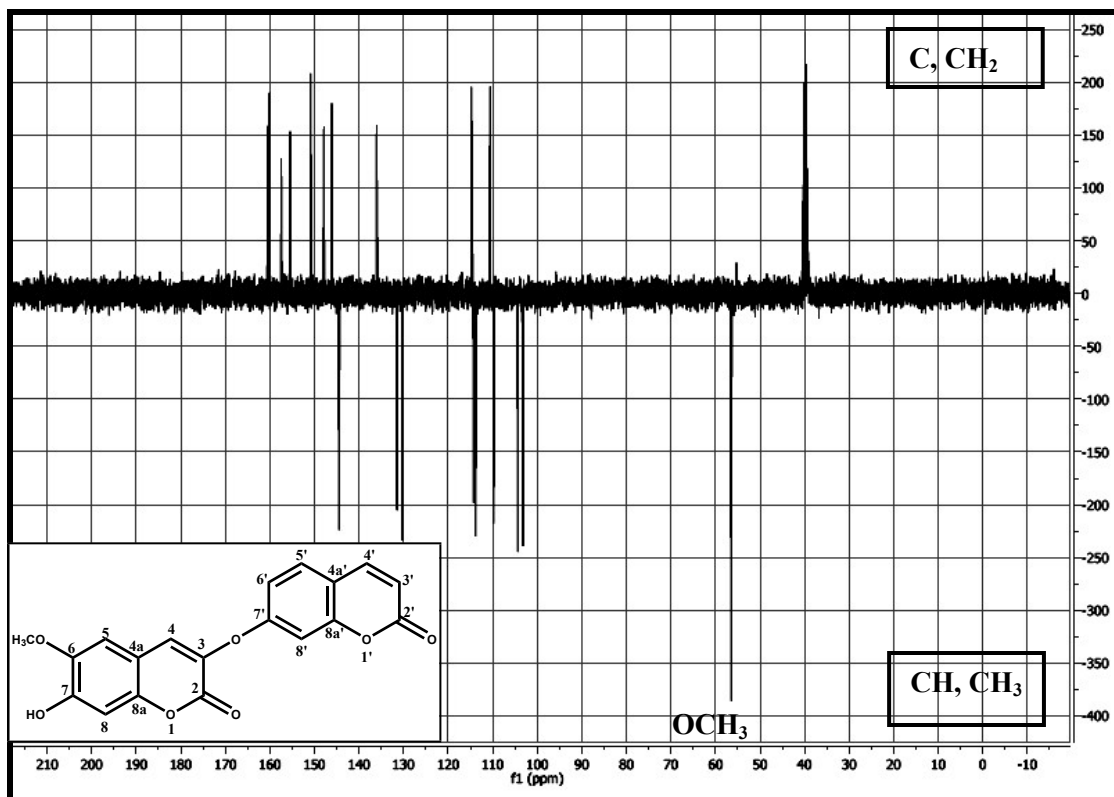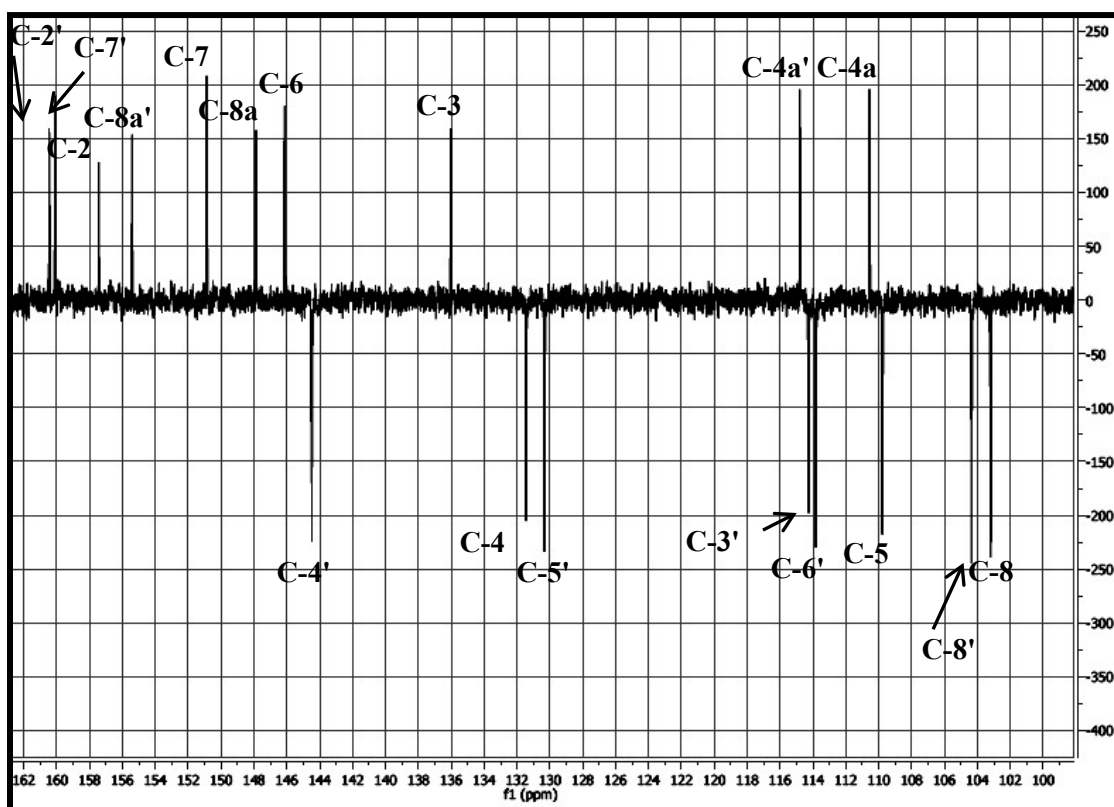

Figure S7: APT spectrum of daphnoretin (1)

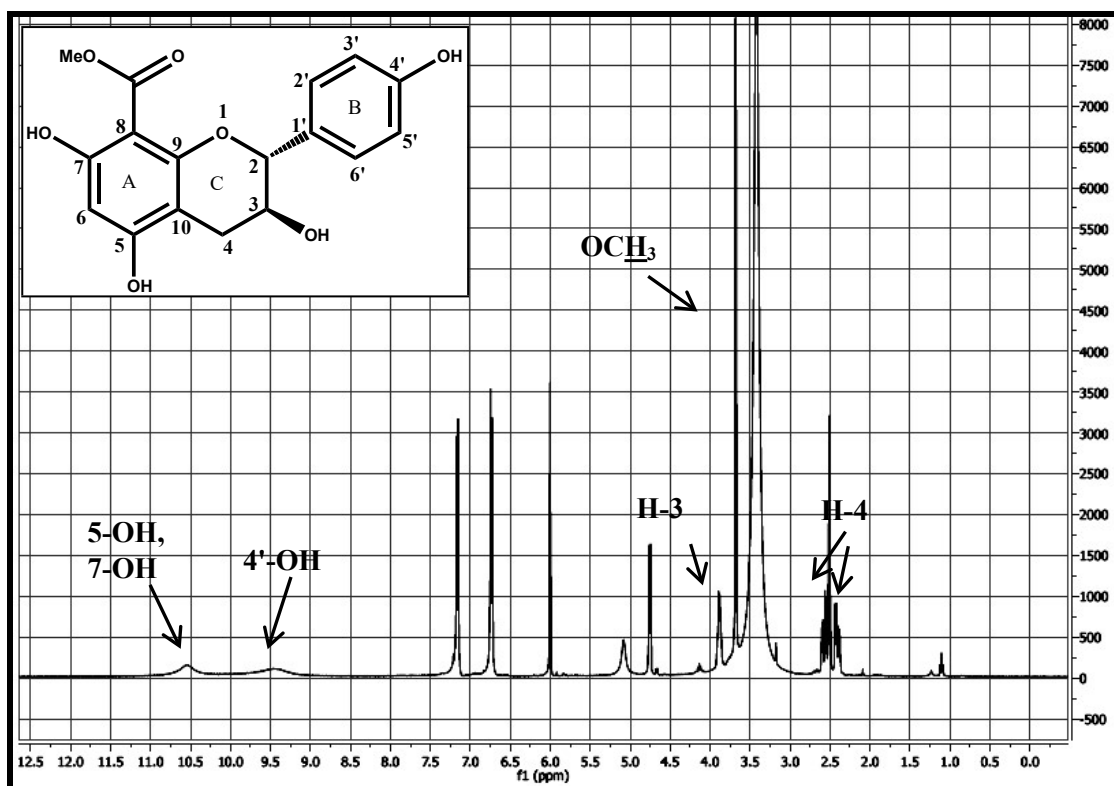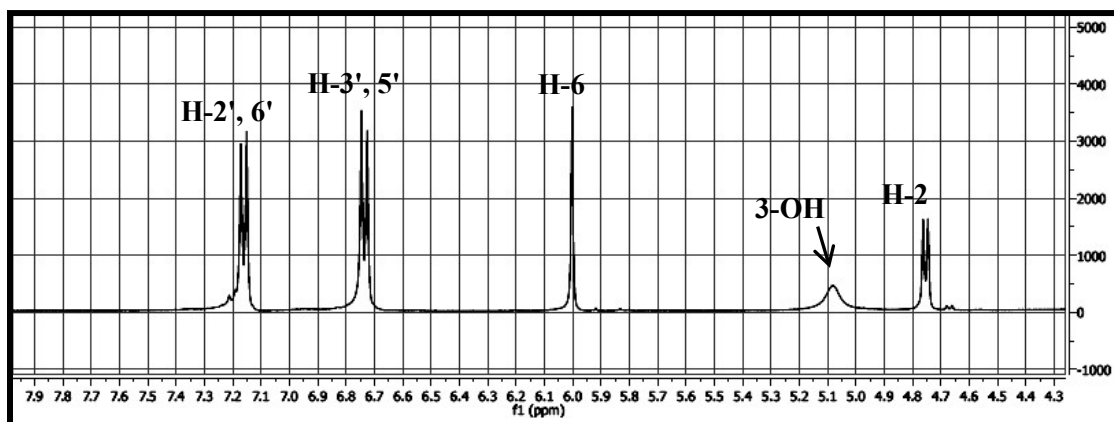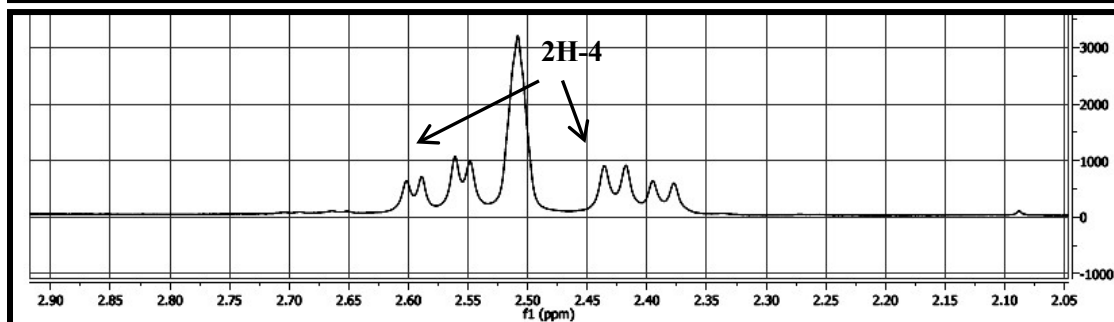

Figure S8: <sup>1</sup>H-NMR spectrum of 5,7,4'-trihydroxy-8-methoxycarbonyl flavanol (2)

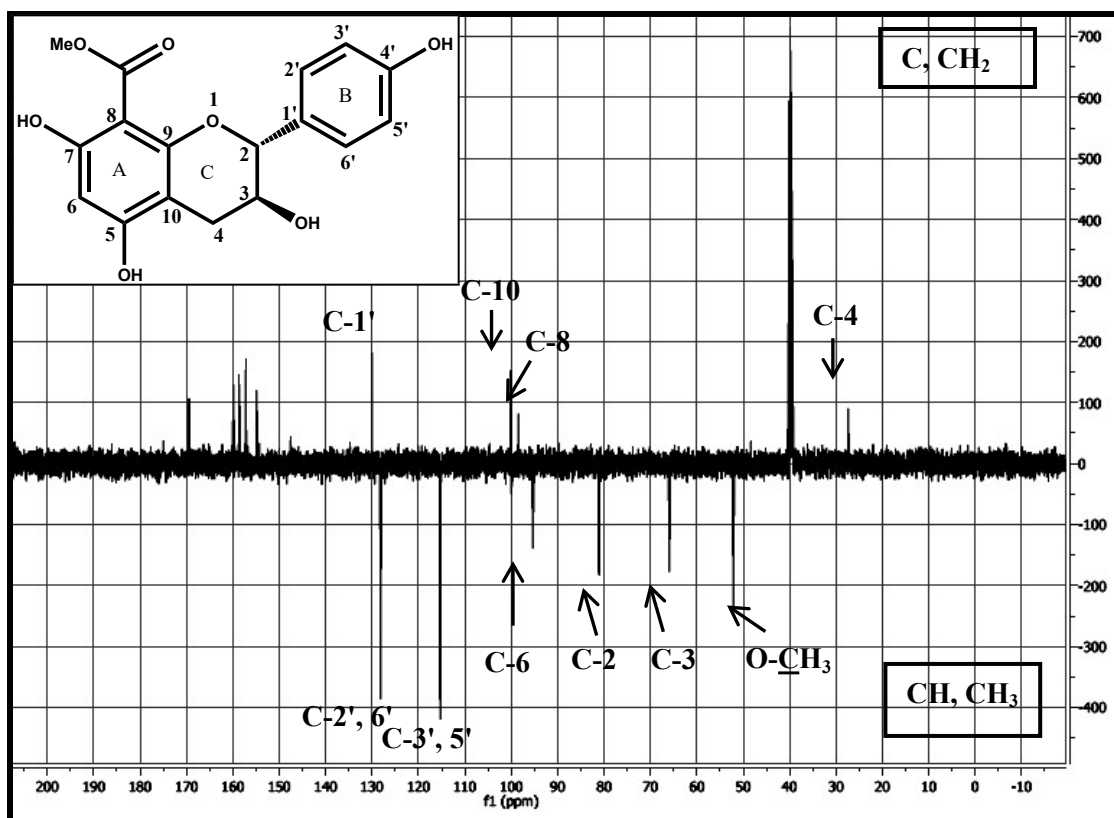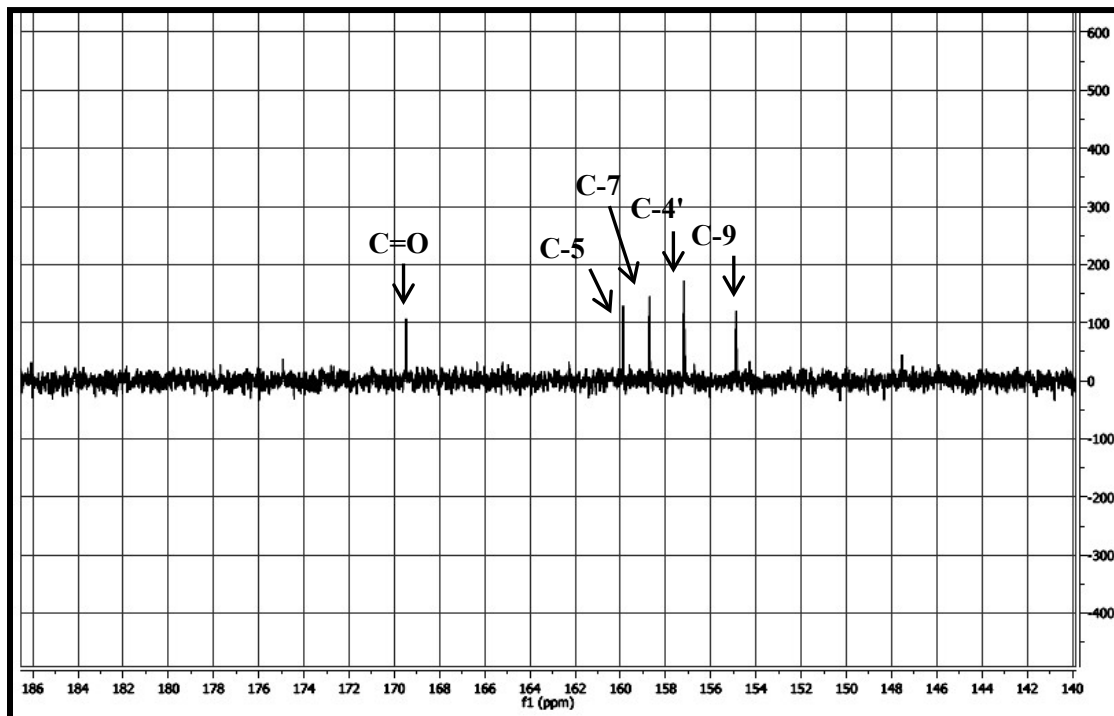

Figure S9: APT spectrum of 5,7,4'-trihydroxy-8-methoxycarbonyl flavanol (2)

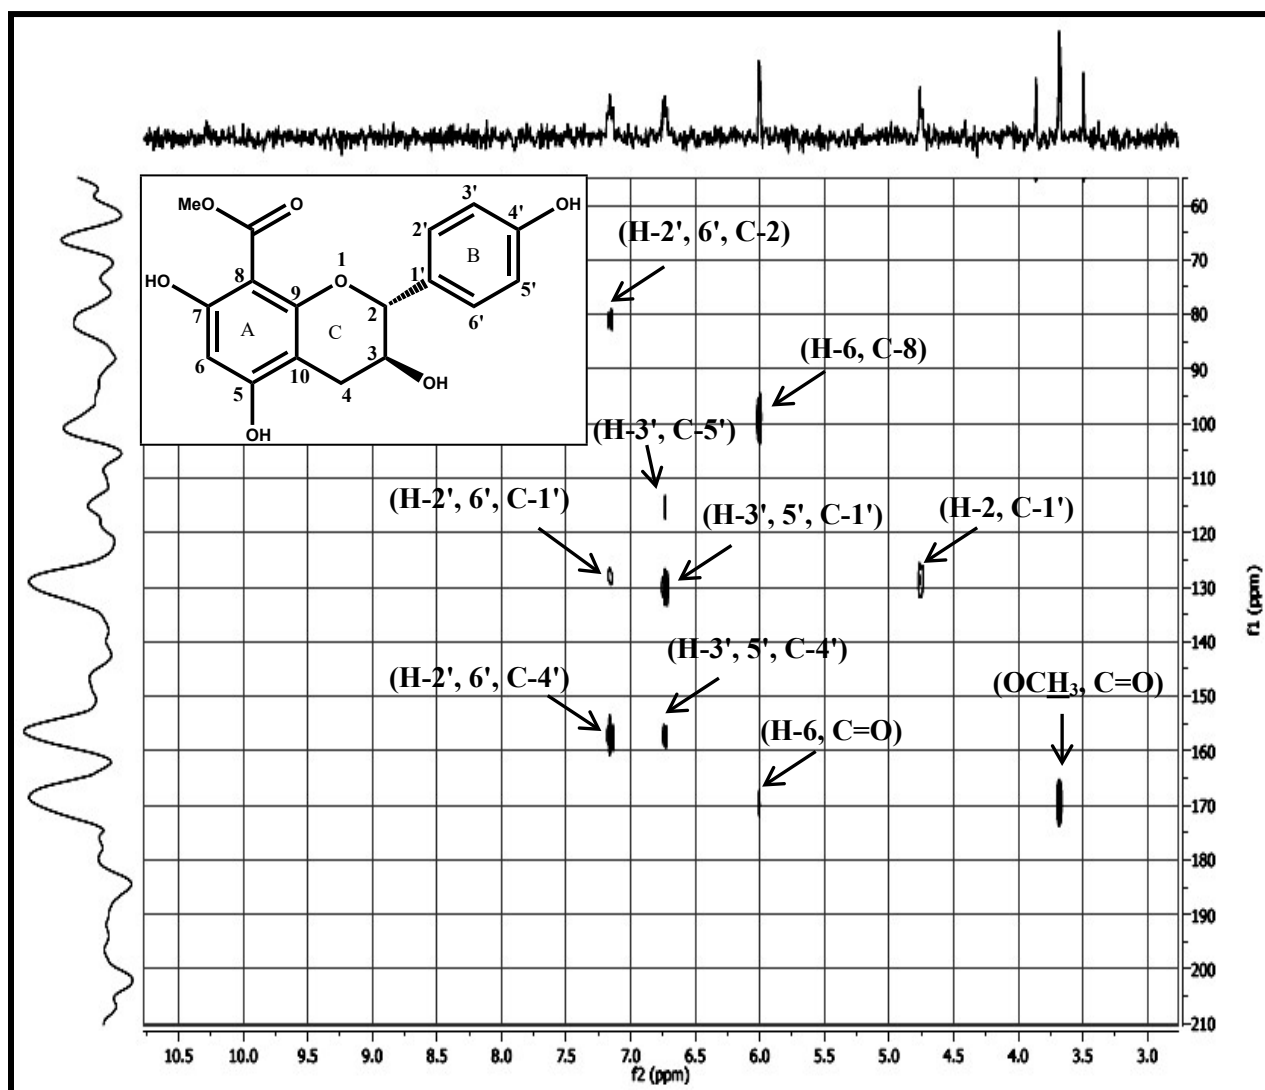

Figure S10: HMBC spectrum of 5,7,4'-trihydroxy-8-methoxycarbonyl flavanol (2)

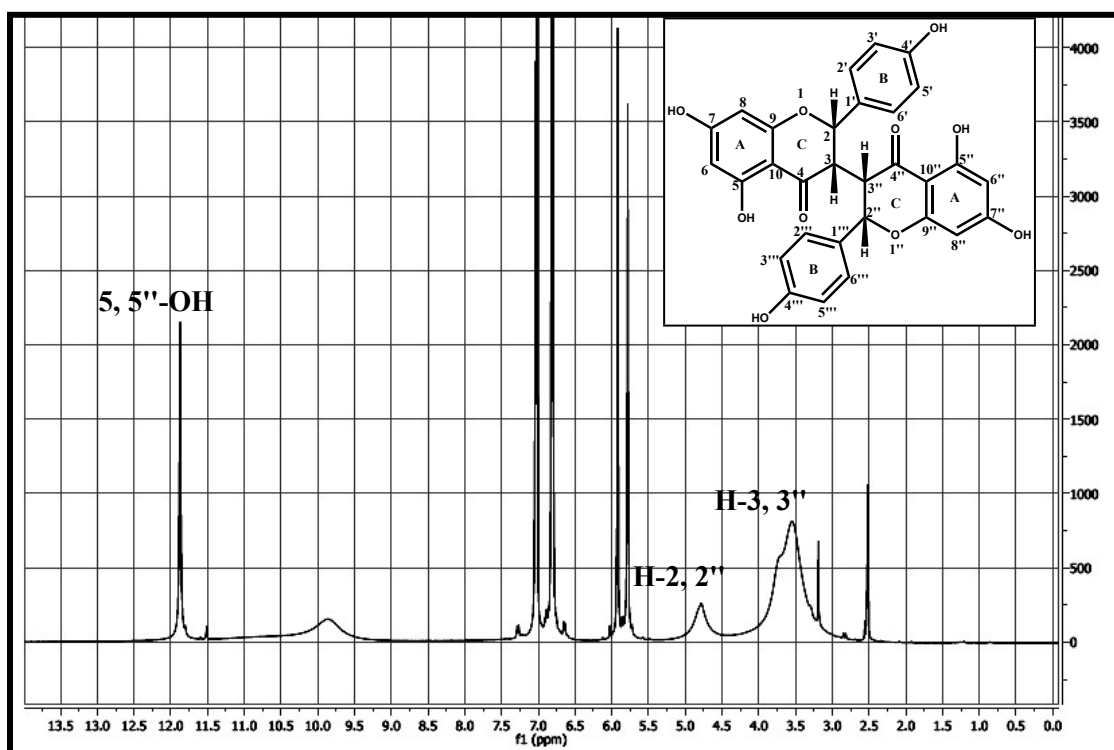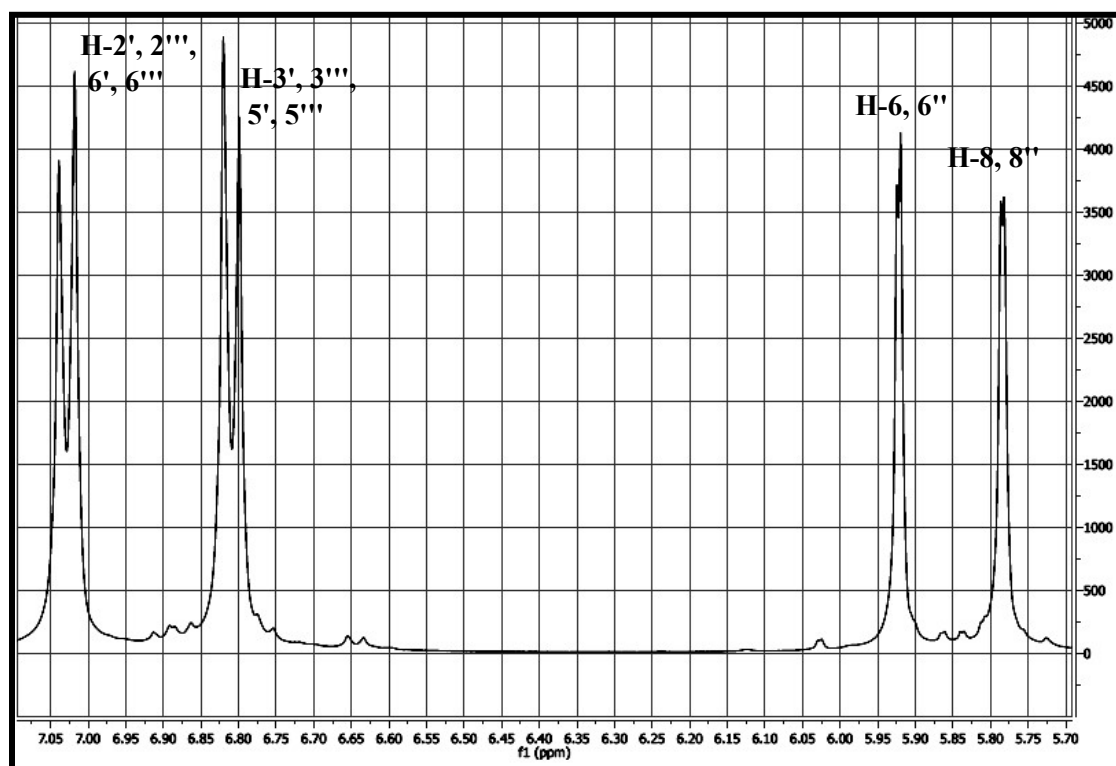

Figure S11: <sup>1</sup>H-NMR spectrum of neochamaejasmin A (3)

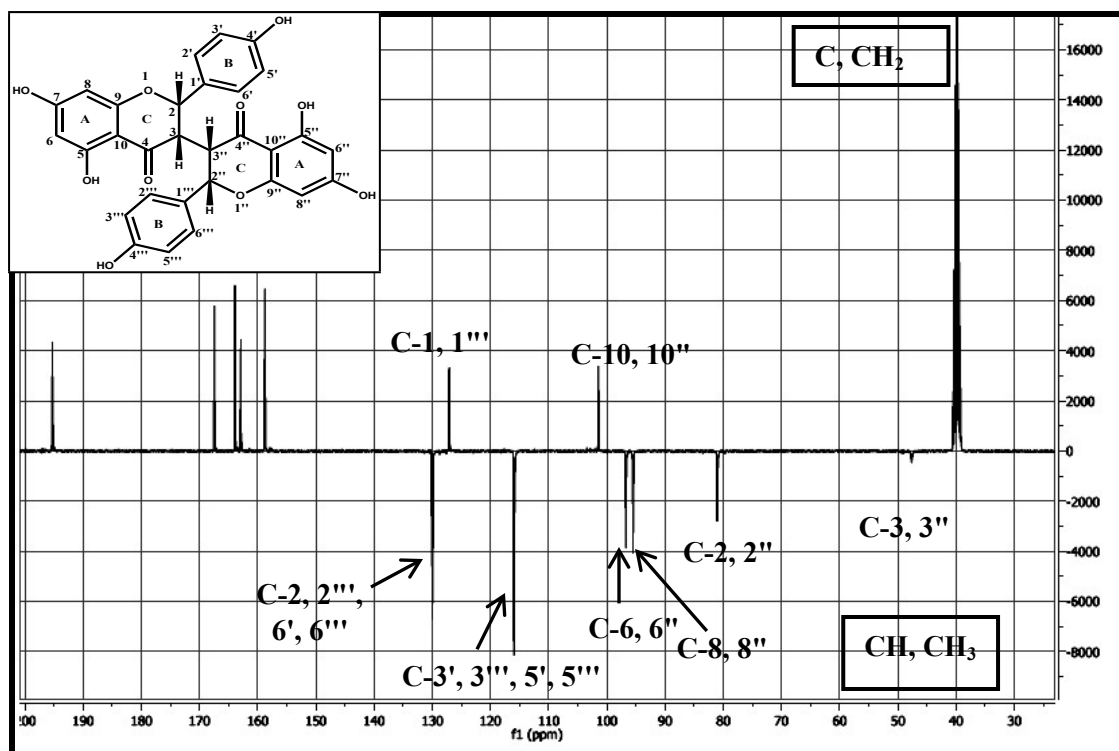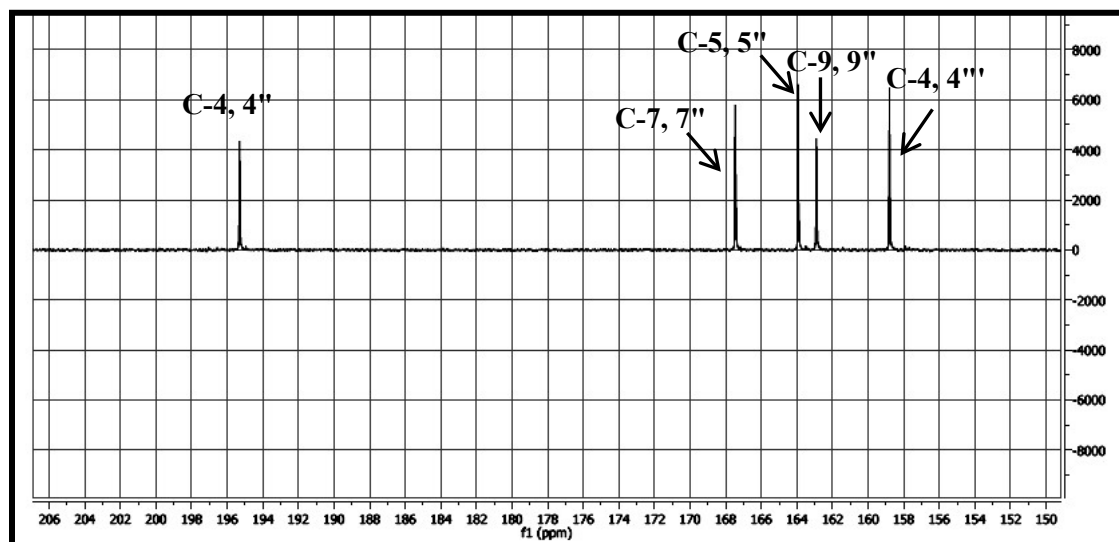

Figure S12: APT spectrum of neochamaejasmin A (3)

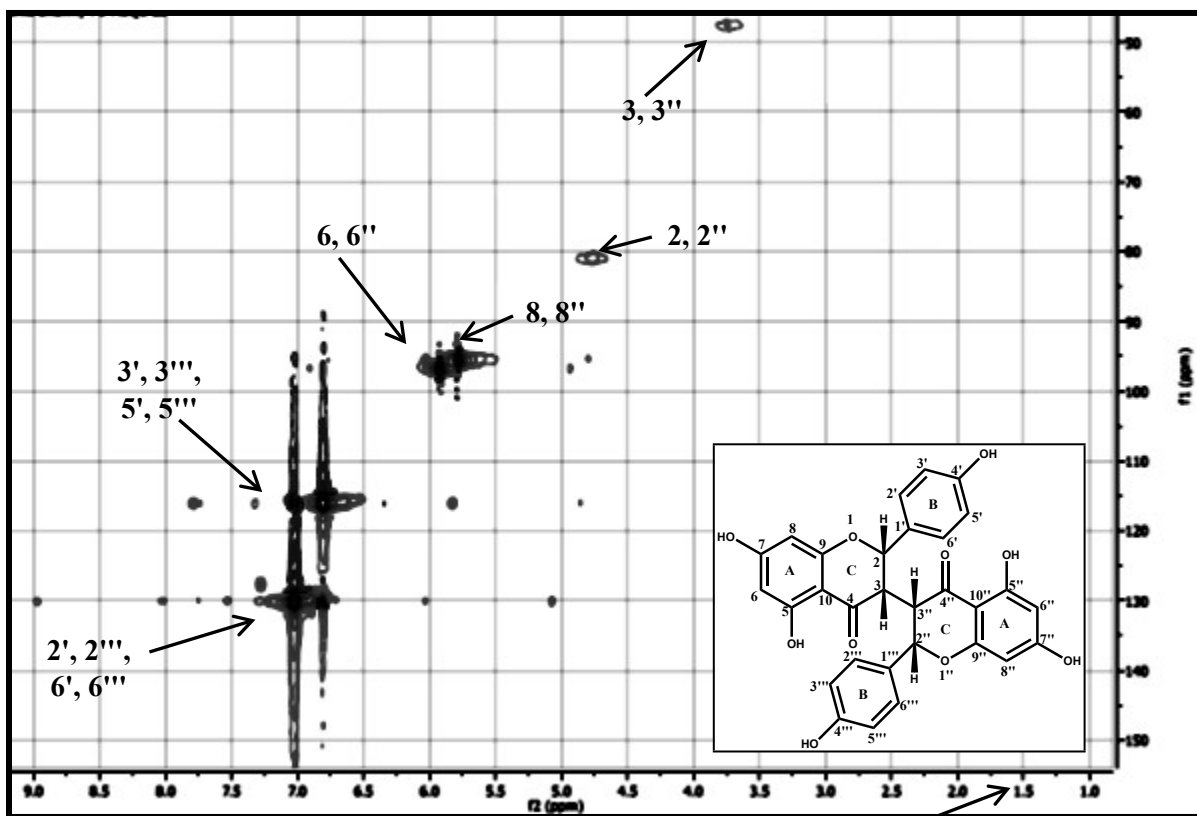

Figure S13: HSQC spectrum of neochamaejasmin A (3)



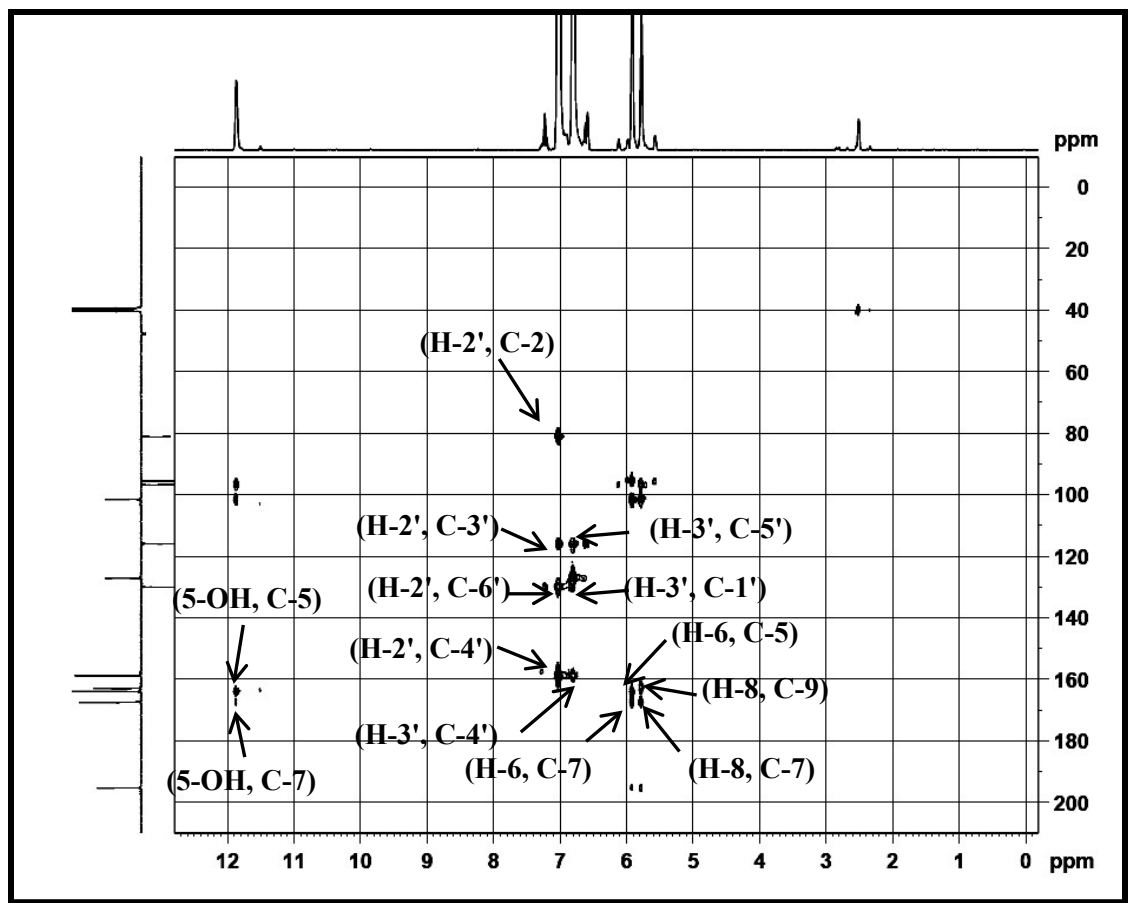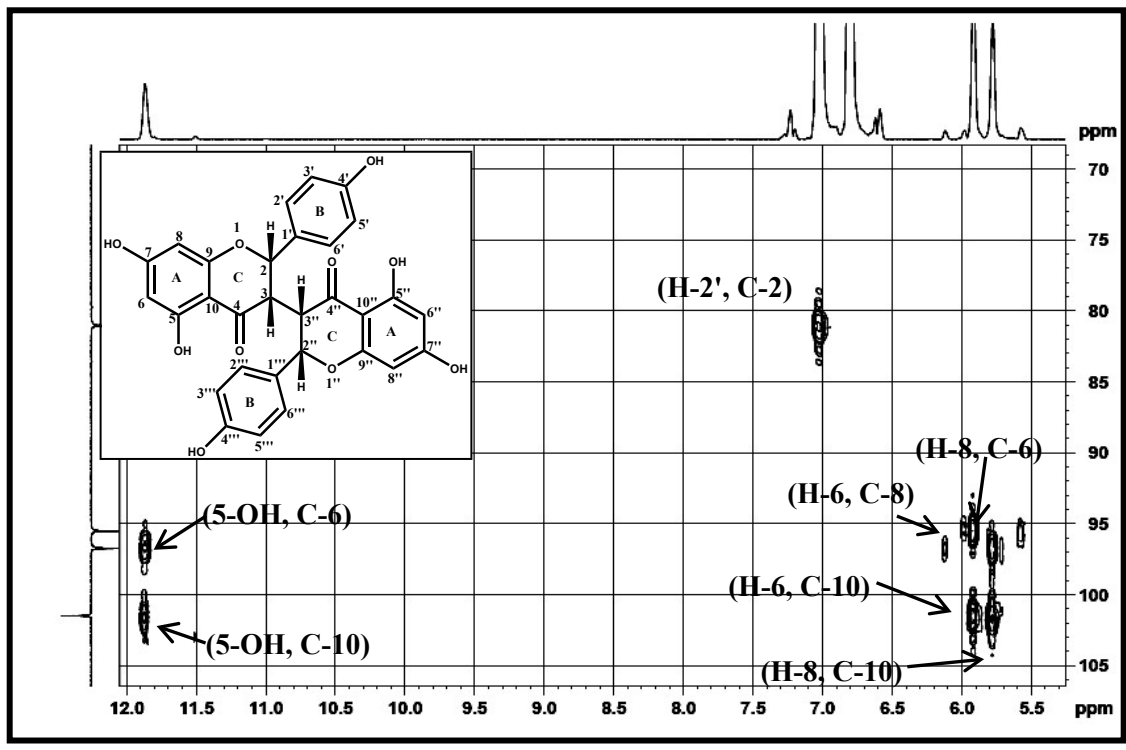

Figure

S14: HMBC spectrum of neochamaejasmin A (3)

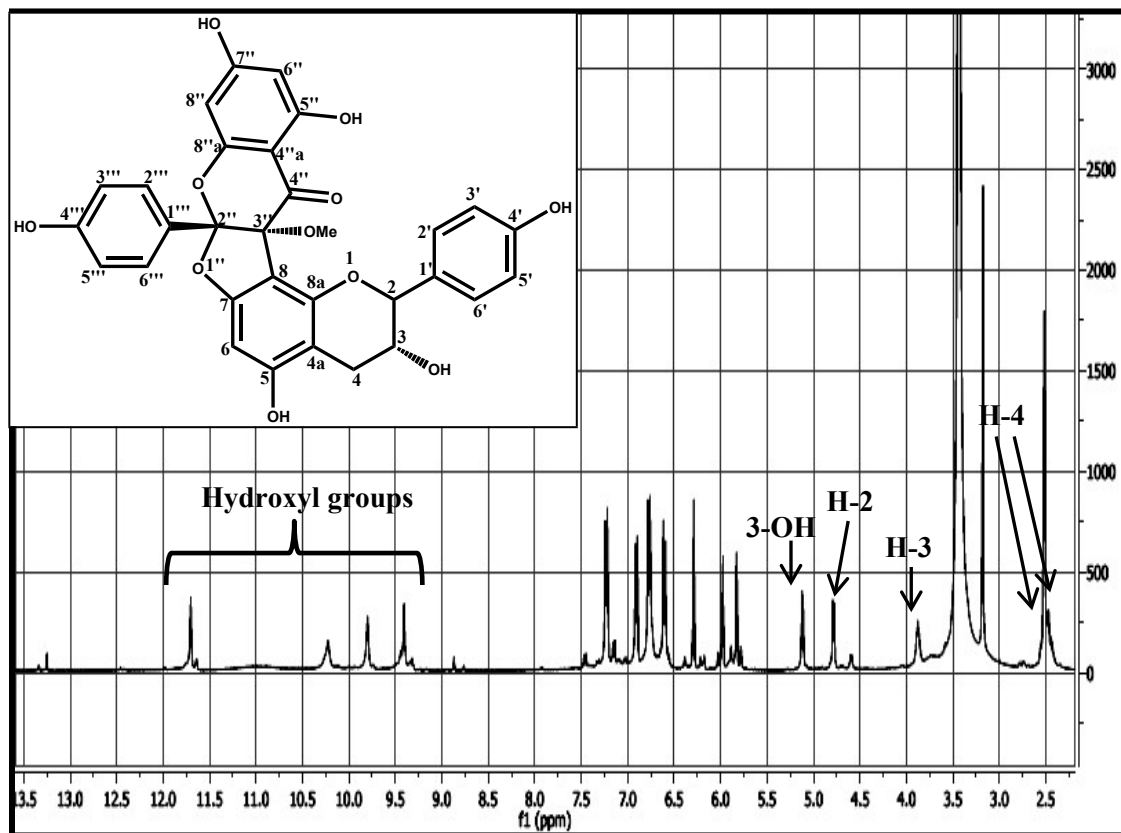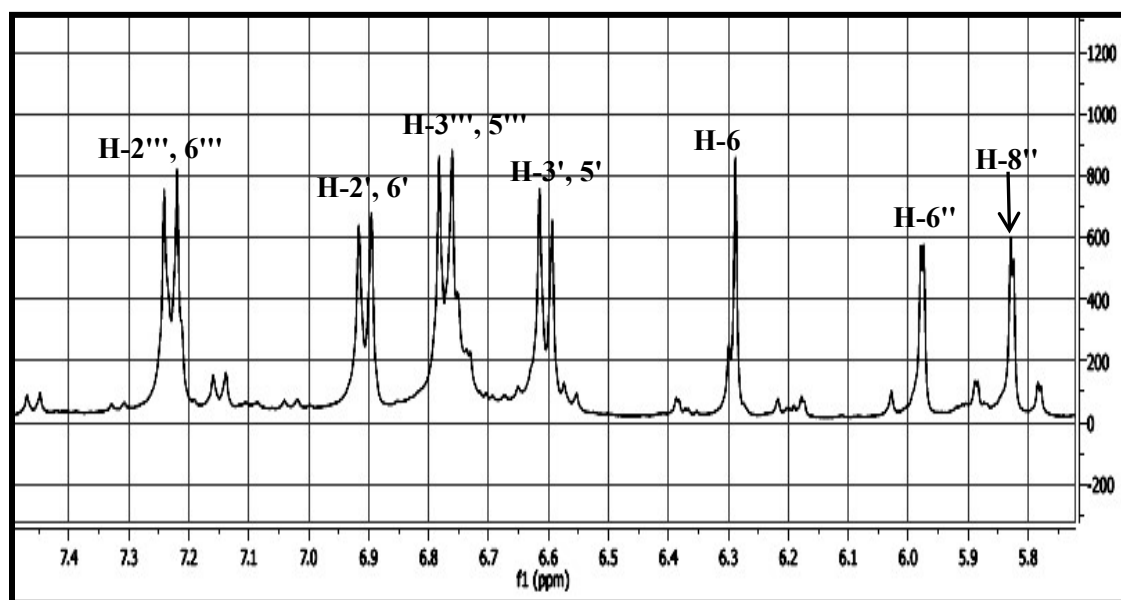

Figure S15:  $^1\text{H-NMR}$  spectrum of daphnodorin G-3''-methyl ether (4)

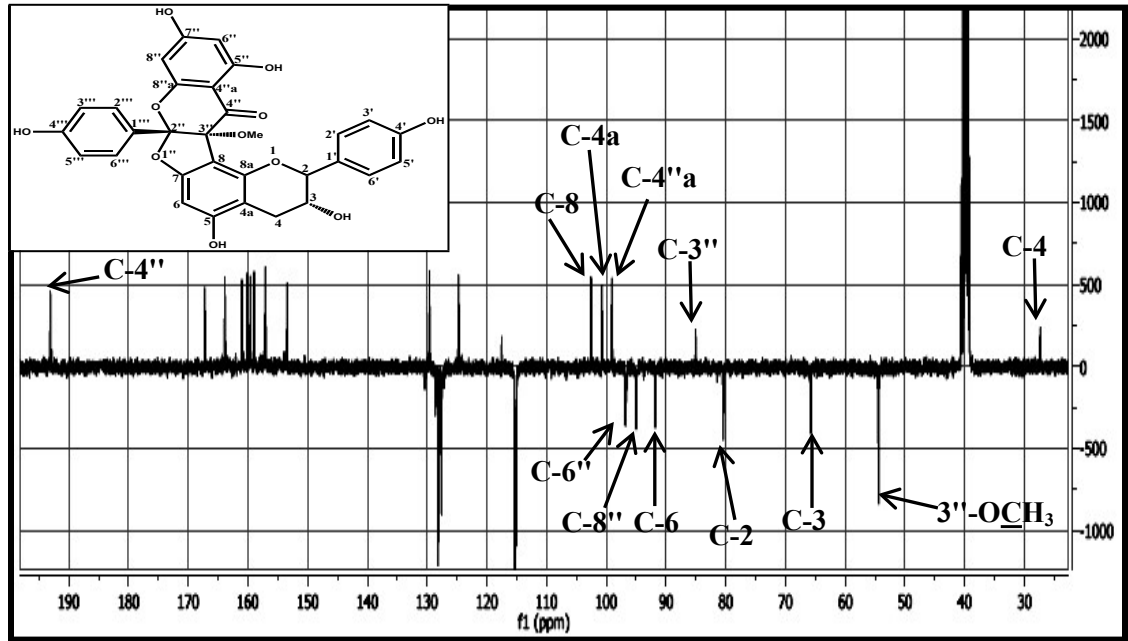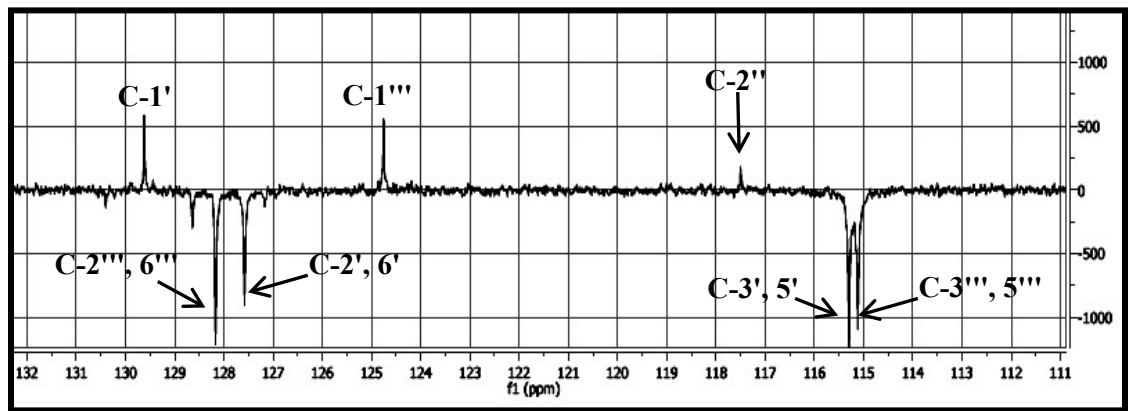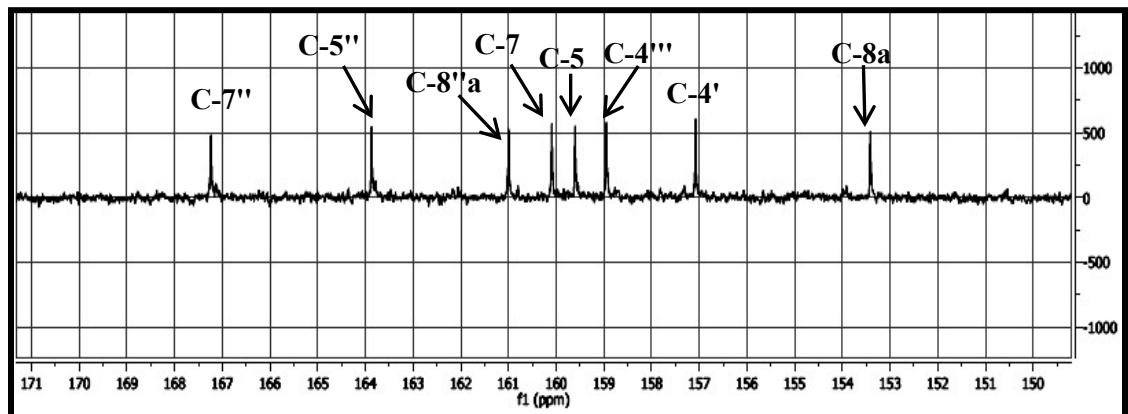

Figure S16: APT spectrum of daphnodorin G-3''-methyl ether (4)

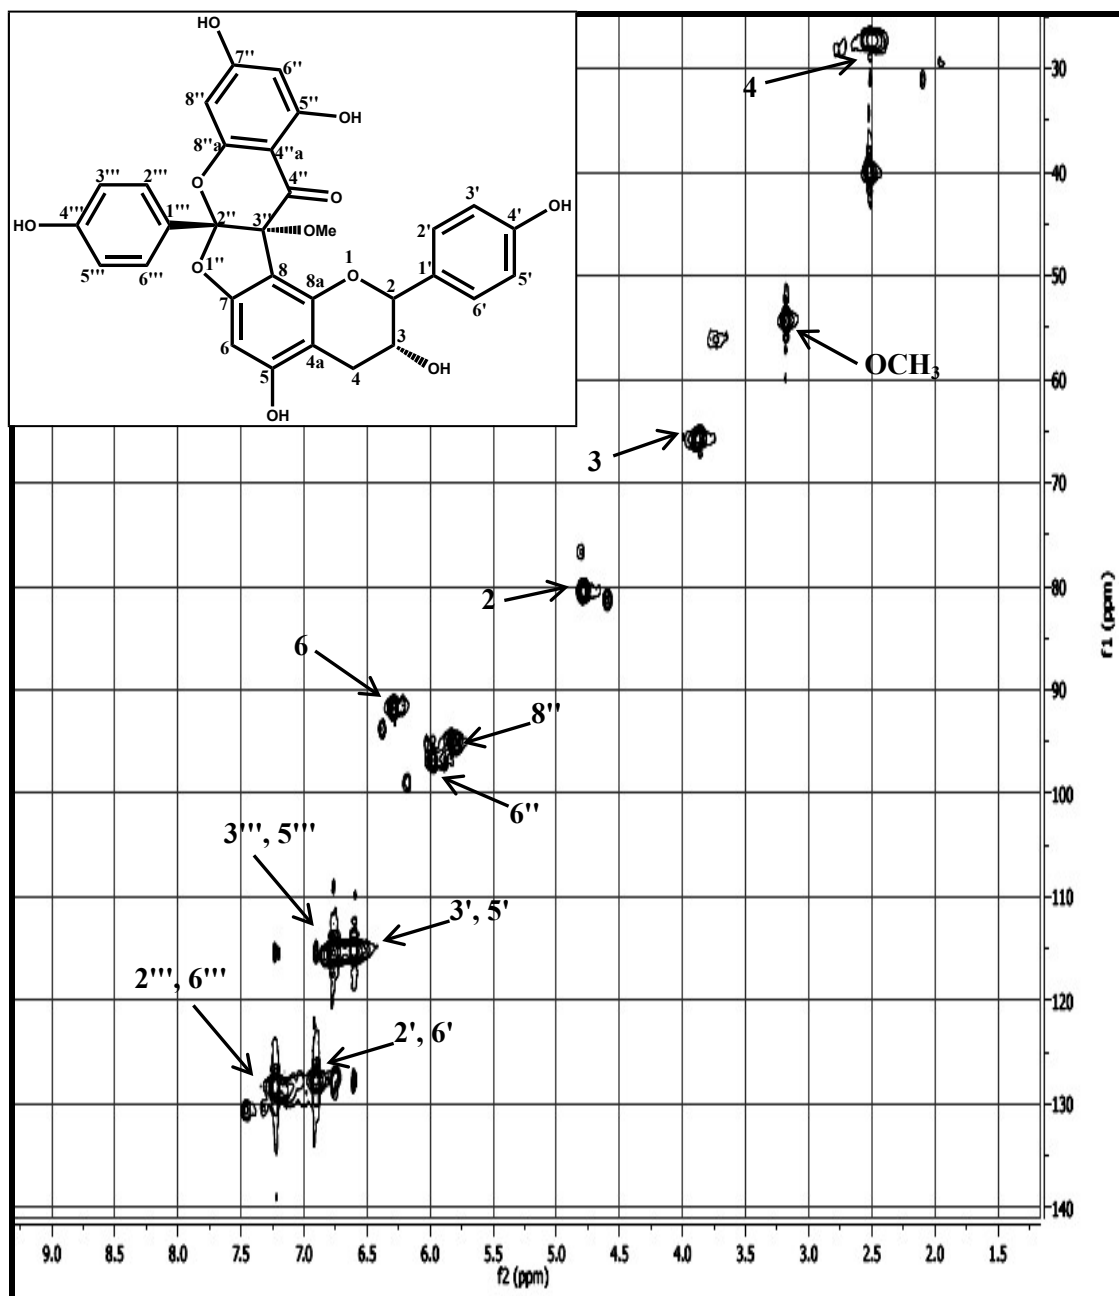

Figure S17: HSQC spectrum of daphnodorin G-3''-methyl ether (4)

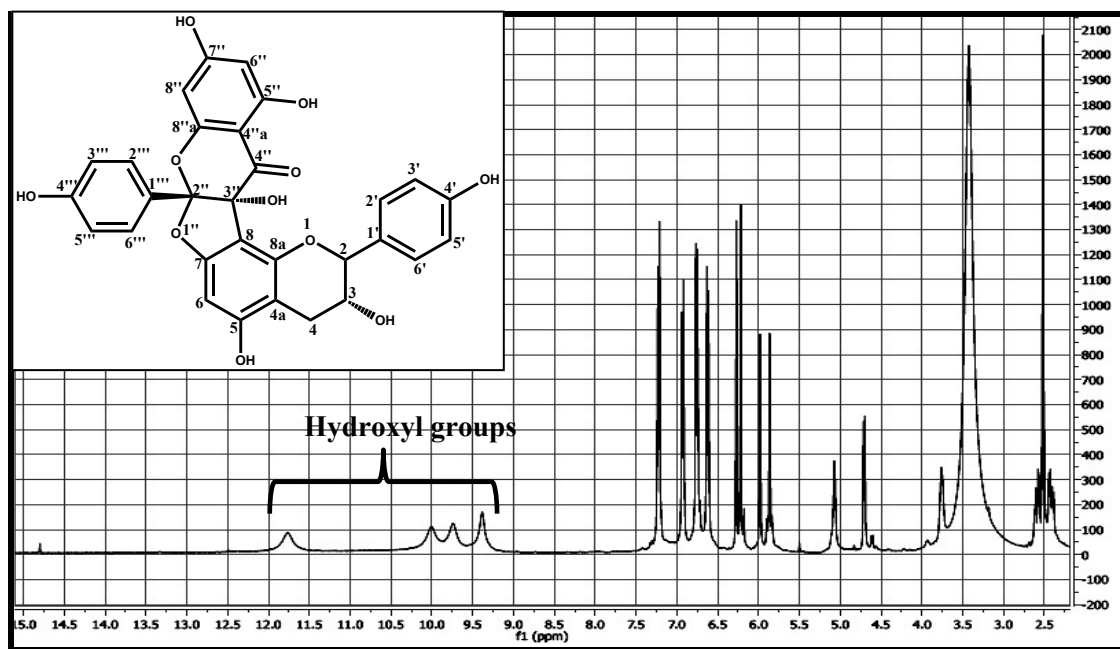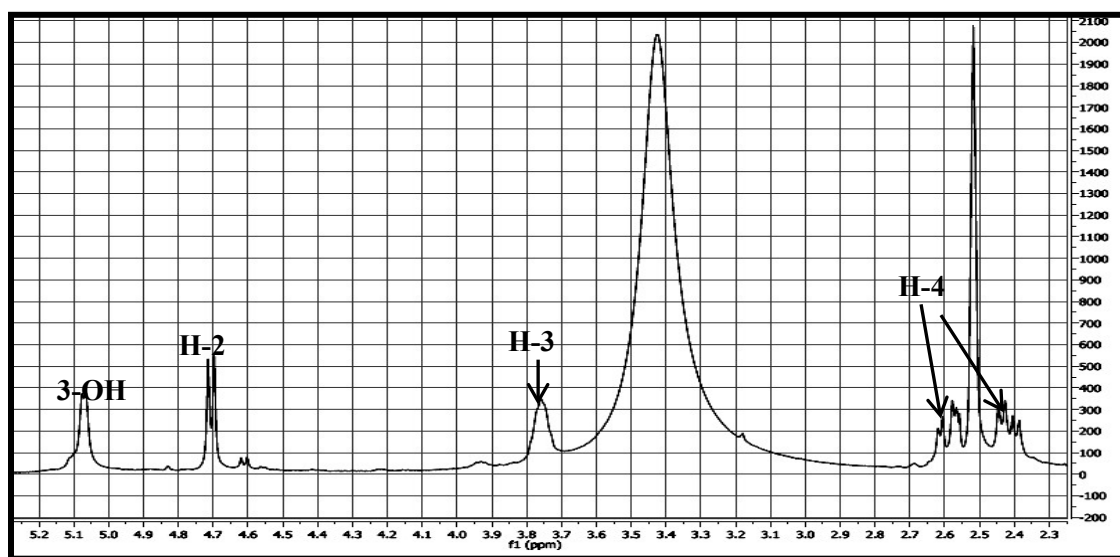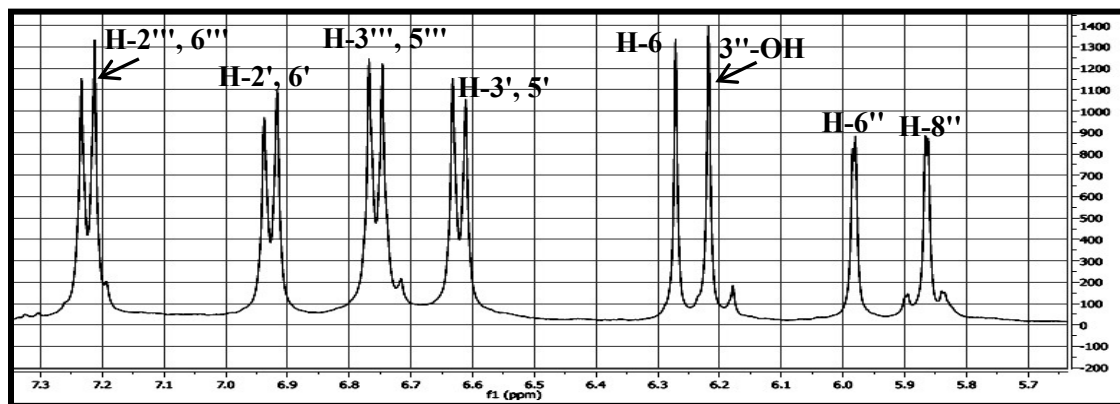

Figure S18: <sup>1</sup>H-NMR spectrum of daphnodorin G (5)

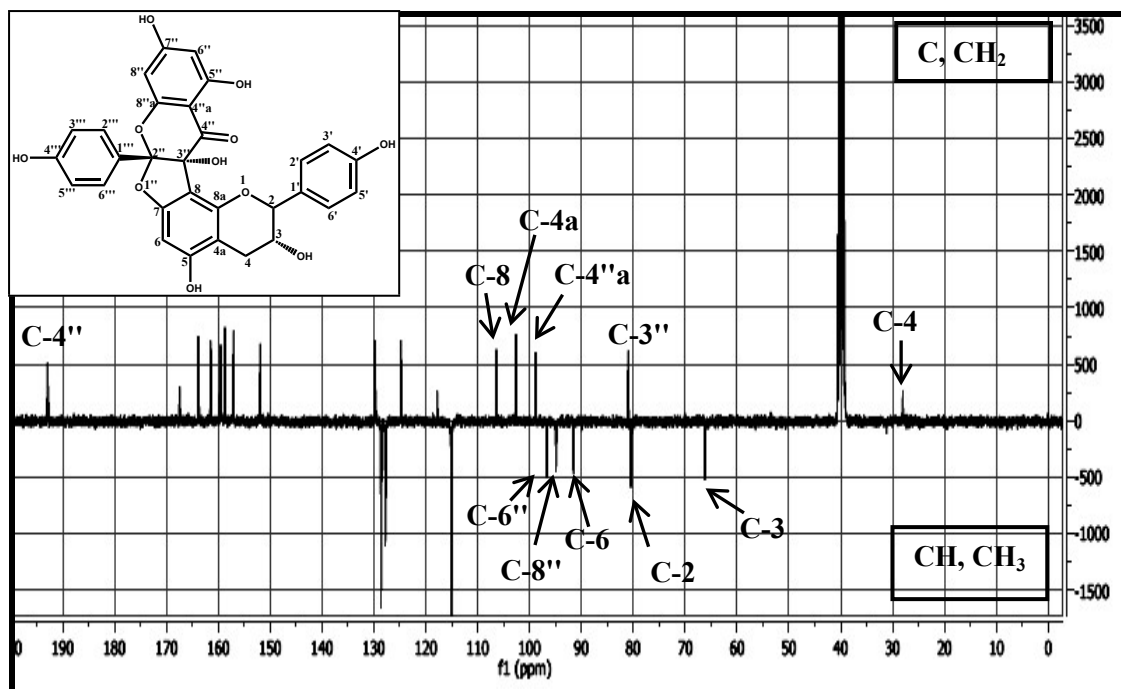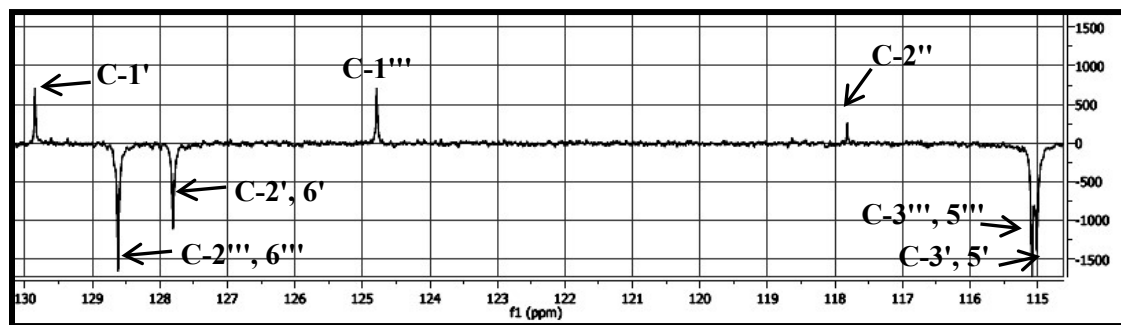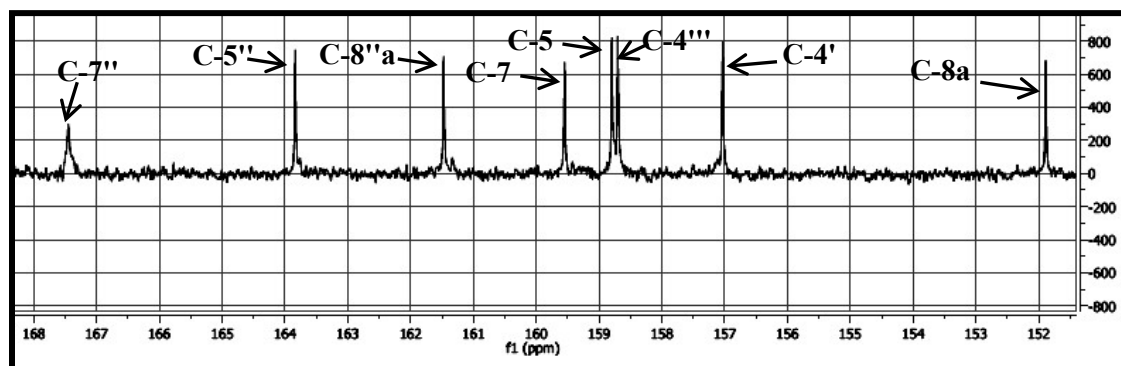

Figure S19: APT spectrum of daphnodorin G (5)

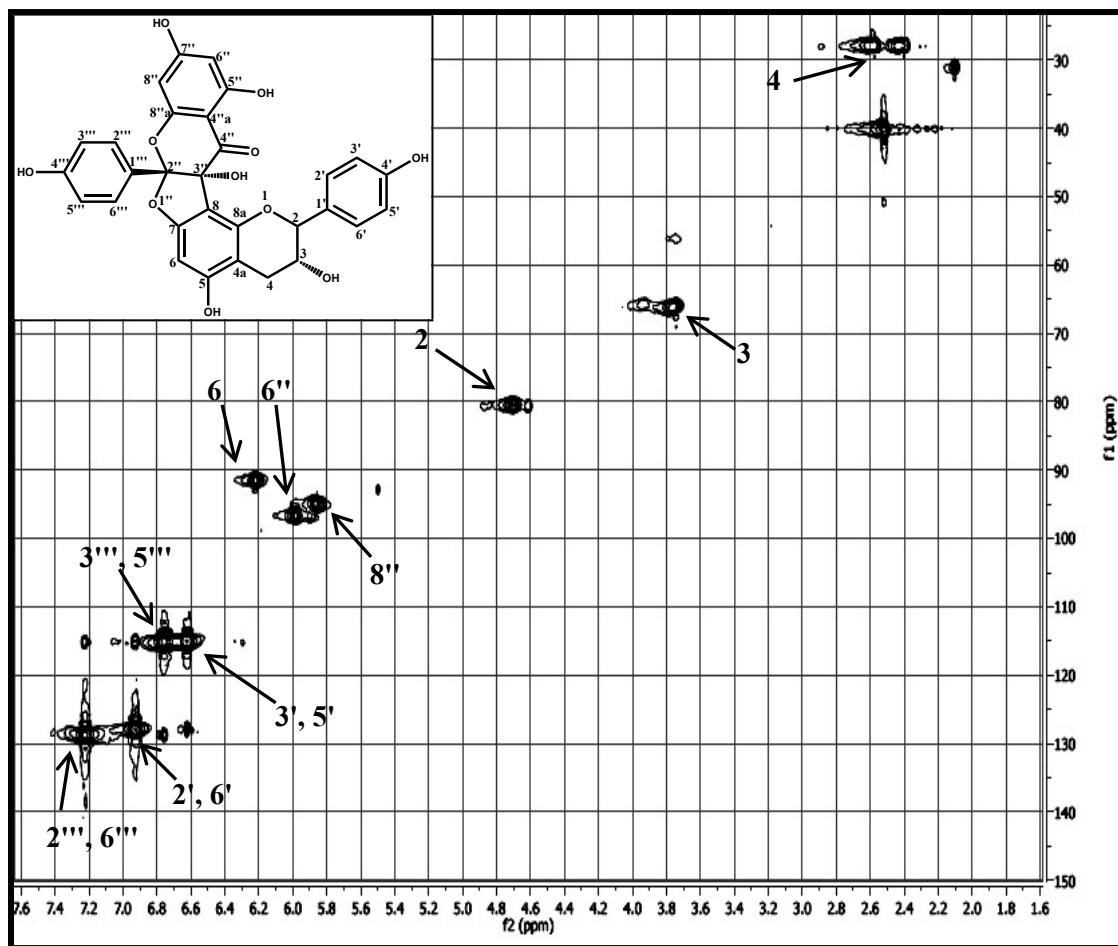

Figure S20: HSQC spectrum of daphnodorin G (5)

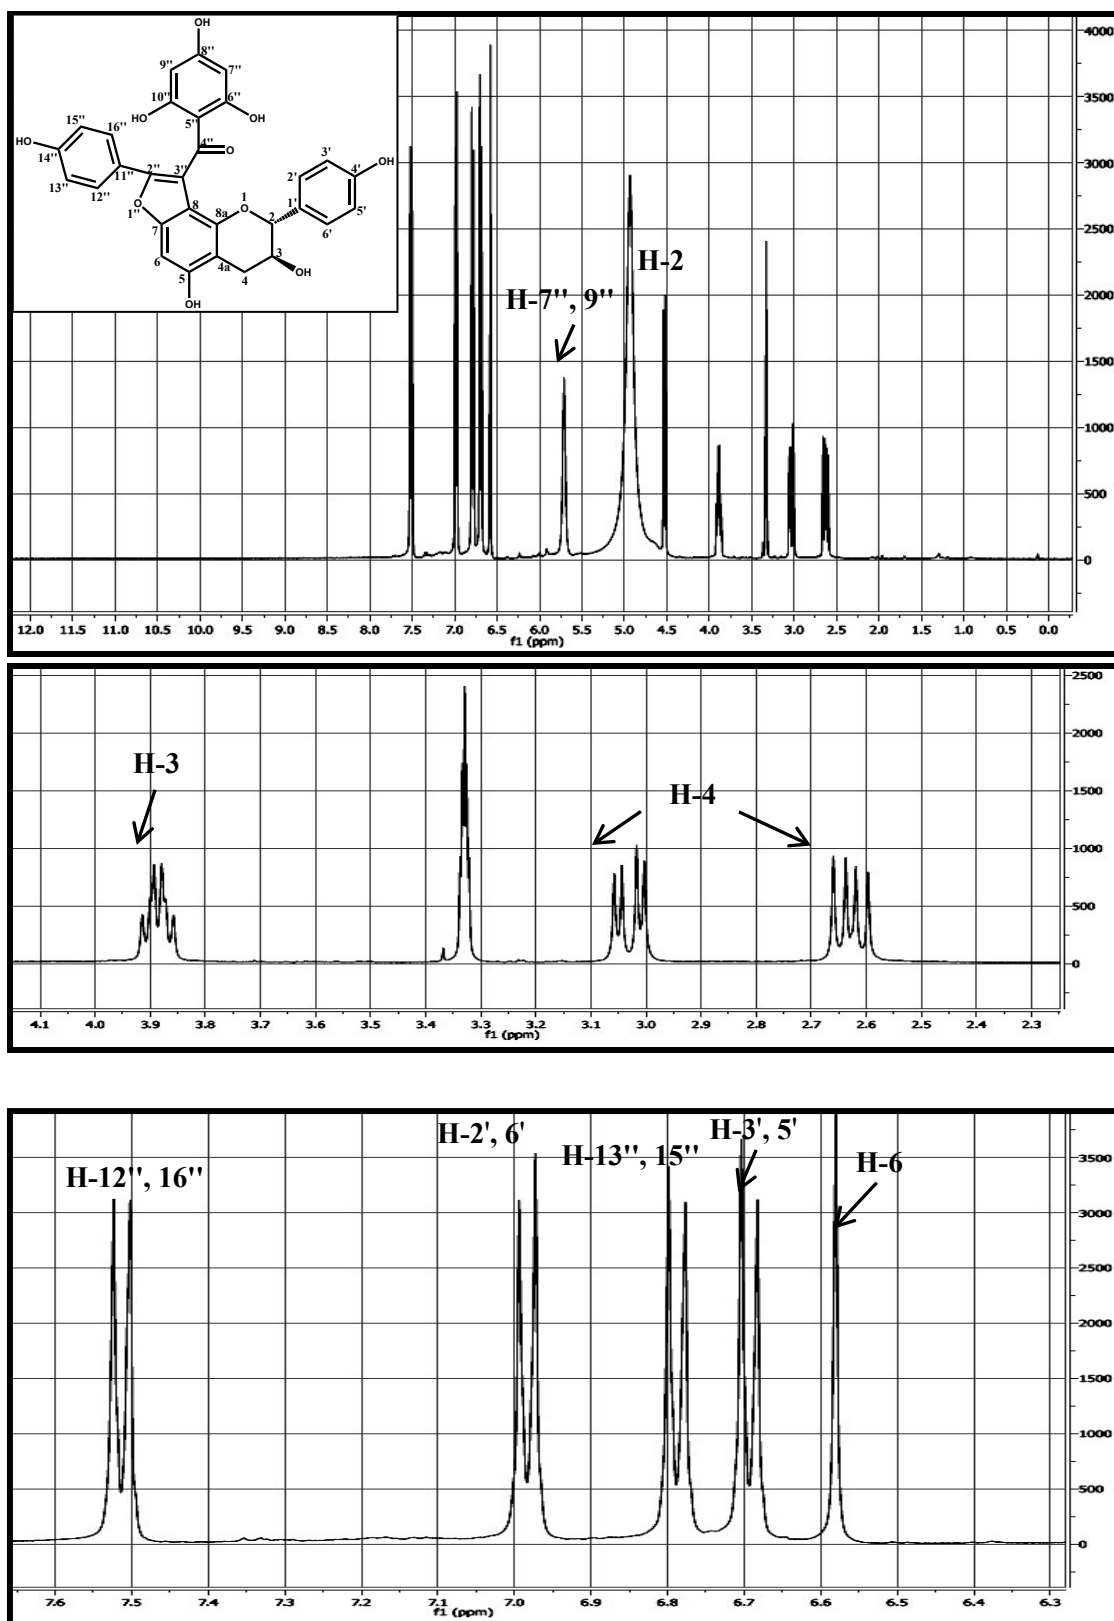

Figure S21:  $^1\text{H-NMR}$  spectrum of daphnodorin B (6)



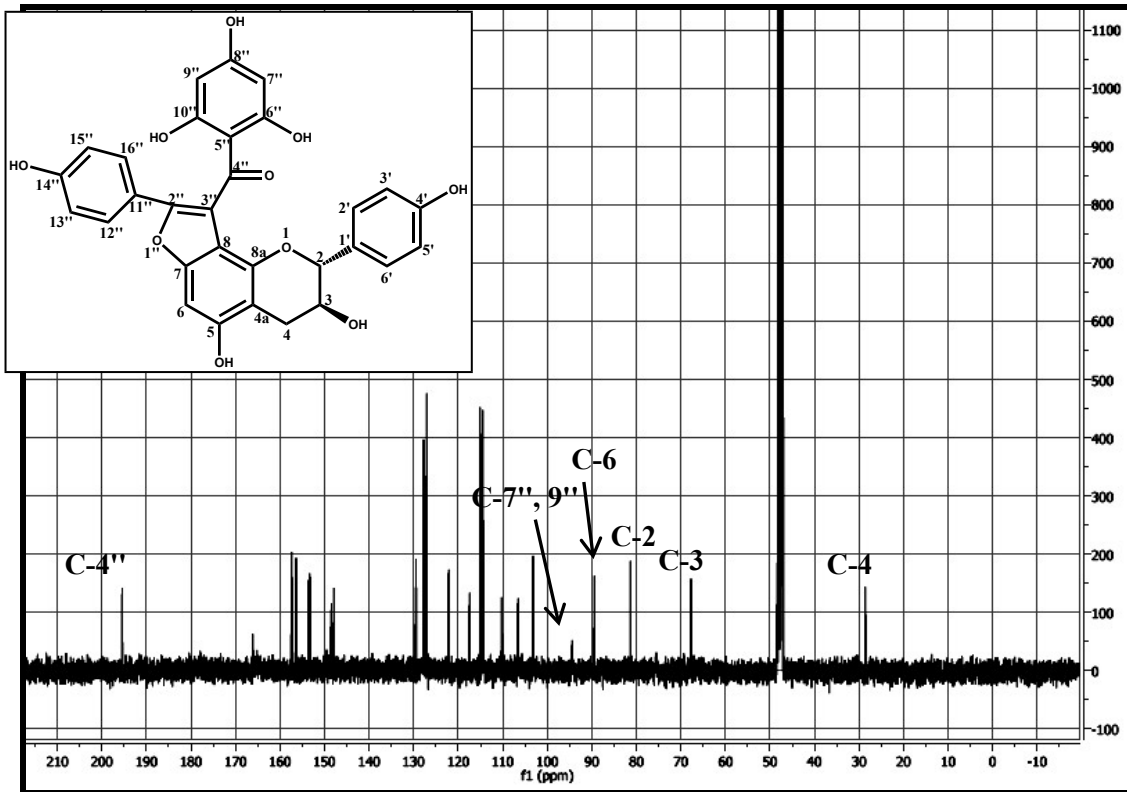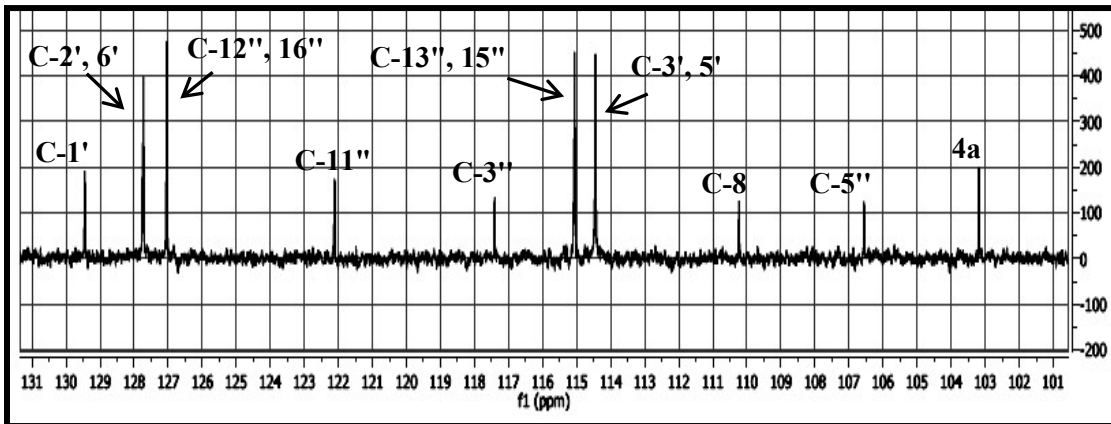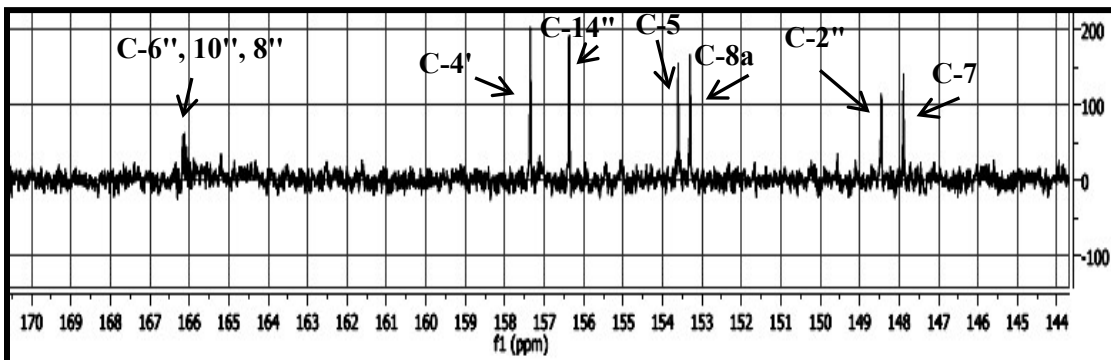

Figure S22:  $^{13}\text{C}$ -NMR spectrum of daphnodorin B (6)

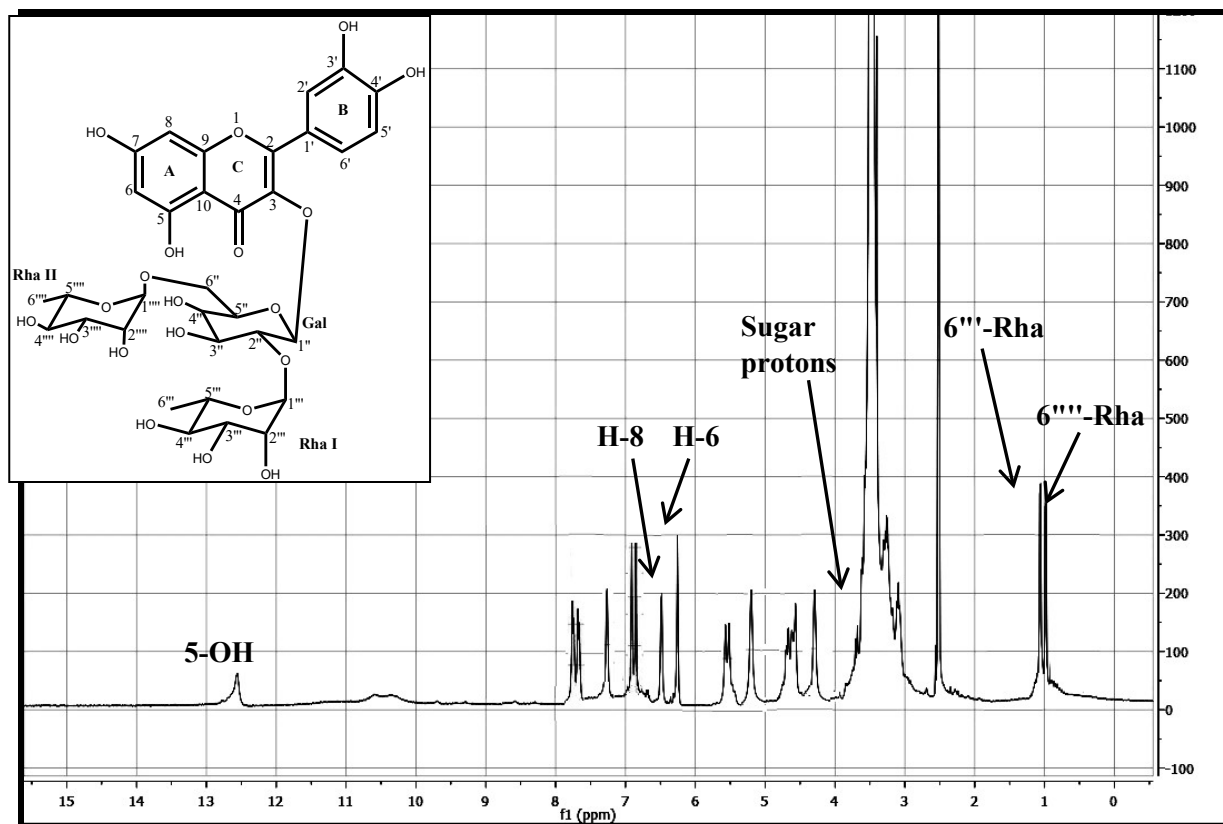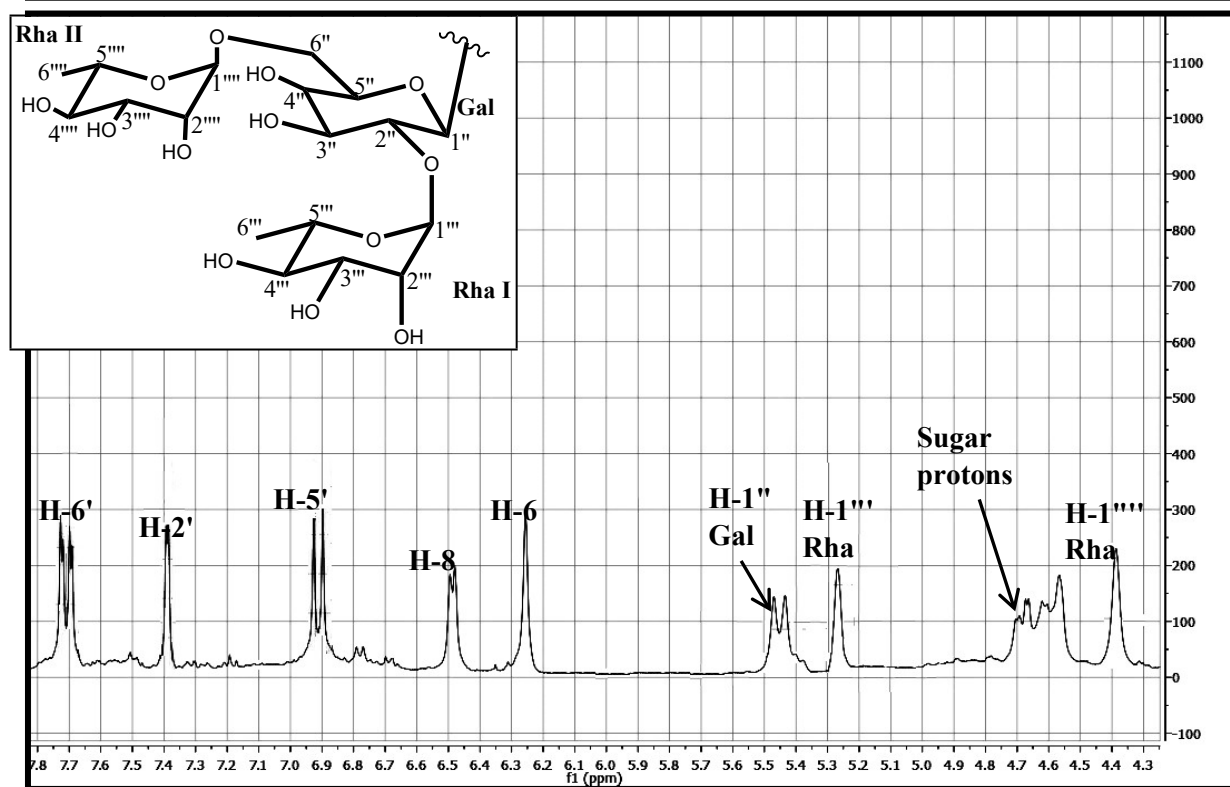

Figure S23:  $^1\text{H-NMR}$  spectrum of quercetin 3-O- $\alpha$ -L-rhamnopyranosyl-(1  $\rightarrow$  2)-[ $\alpha$ -L-rhamnopyranosyl-(1  $\rightarrow$  6)]- $\beta$ -D-galactopyranoside

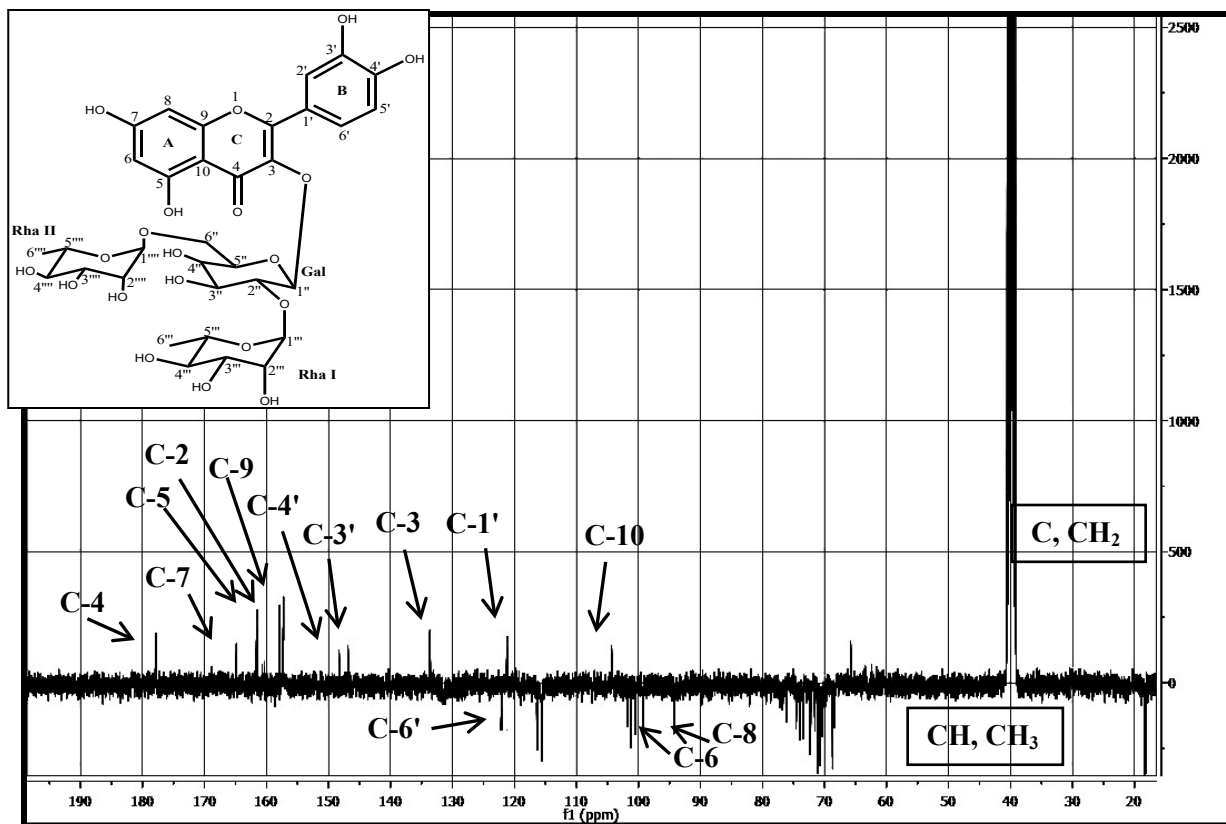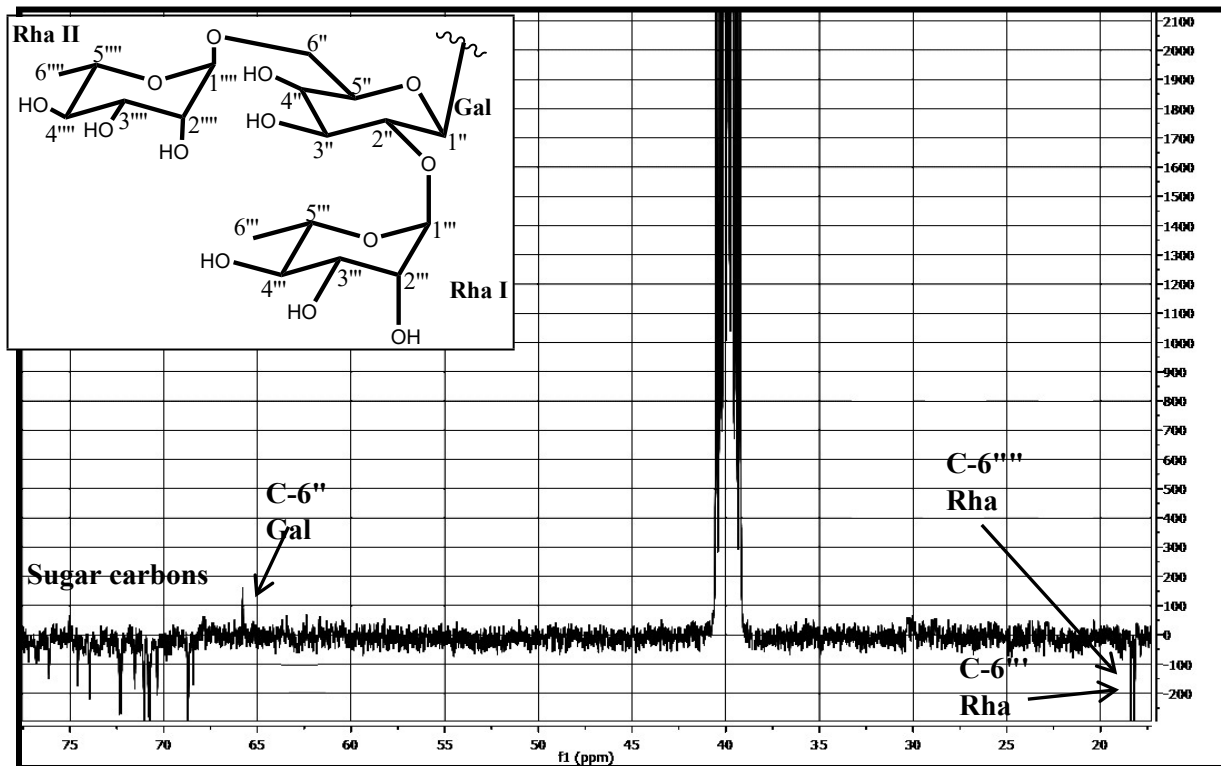

Figure S24: APT spectrum of quercetin 3-O- $\alpha$ -L-rhamnopyranosyl-(1  $\rightarrow$  2)-[ $\alpha$ -L-rhamnopyranosyl-(1  $\rightarrow$  6)]- $\beta$ -D-galactopyranoside

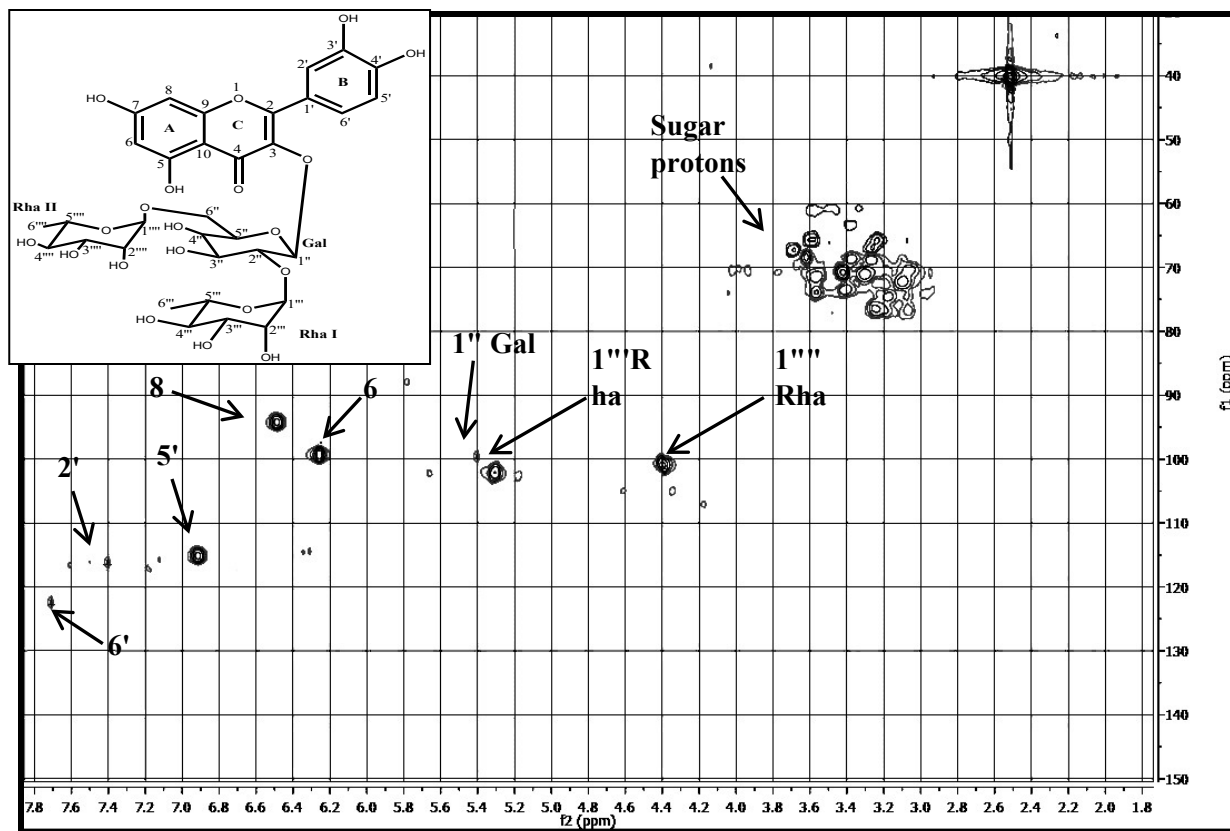

**Figure S25: HSQC spectrum of quercetin 3-O- $\alpha$ -L-rhamnopyranosyl-(1  $\rightarrow$  2)- [ $\alpha$ -L-rhamnopyranosyl-(1  $\rightarrow$  6)]- $\beta$ -D-galactopyranoside**

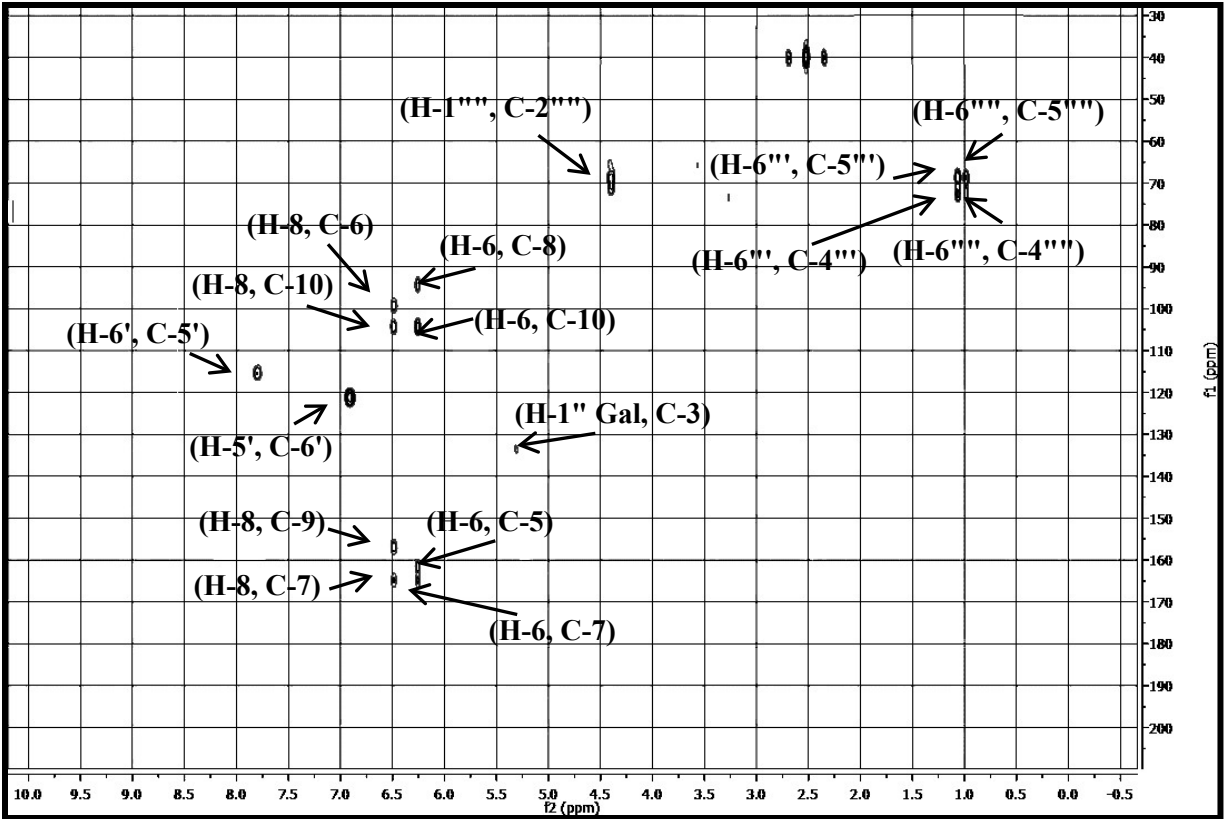

Figure S26: HMBC spectrum of quercetin 3-*O*- $\alpha$ -L-rhamnopyranosyl-(1  $\rightarrow$  2)- [ $\alpha$ -L-rhamnopyranosyl-(1  $\rightarrow$  6)]- $\beta$ -D-galactopyranoside

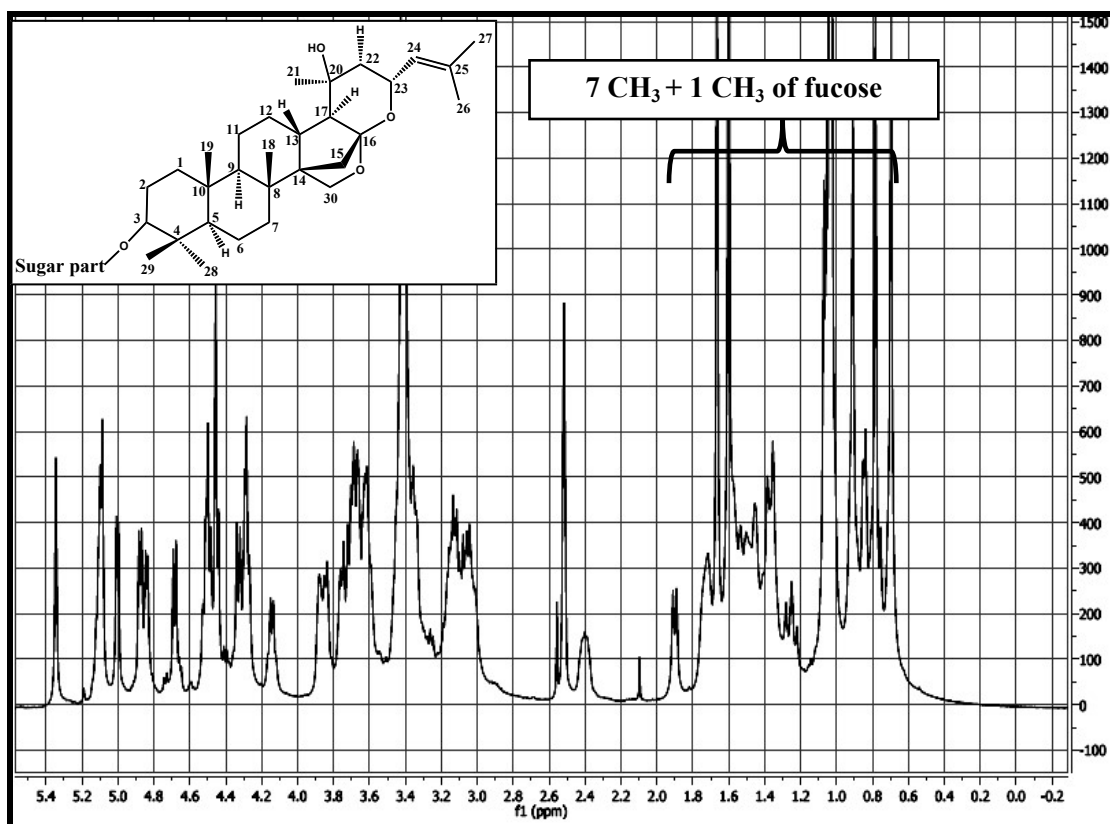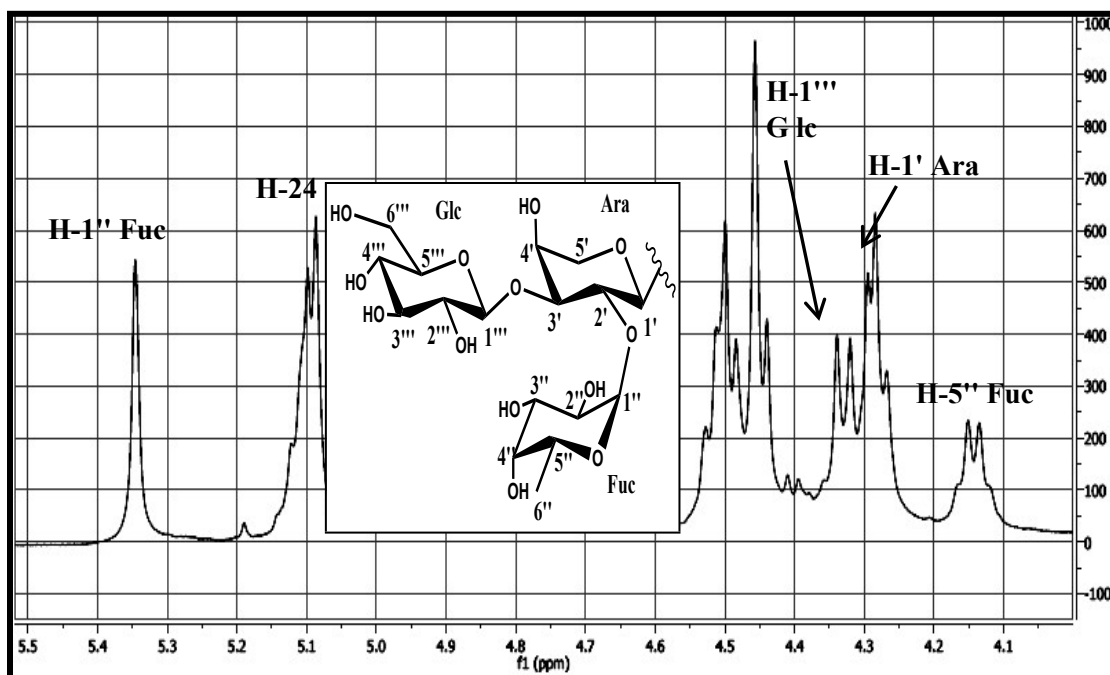

Figure S27: <sup>1</sup>H-NMR spectrum of 3-*O*- [α-*L*-fucopyranosyl (1→2) -β-*D*-glucopyranosyl (1→3)-α-*L*-arabinopyranosyl] jujubogenin (christinin A)

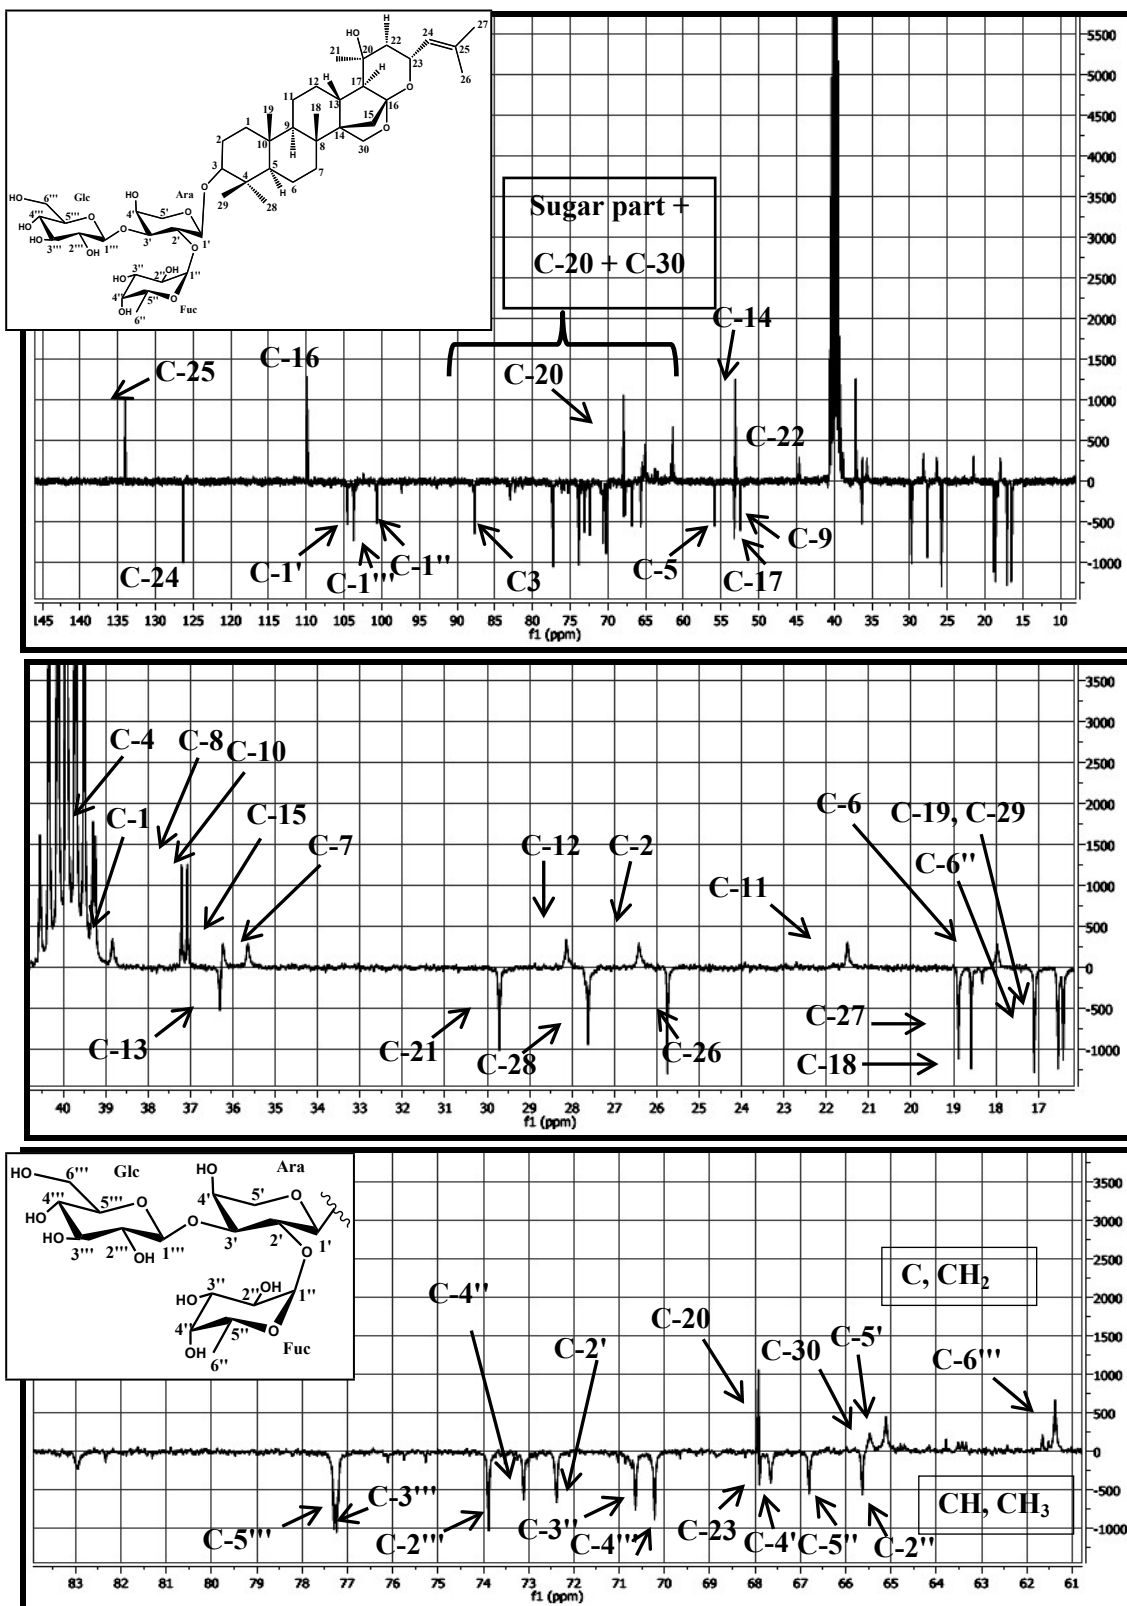

Figure S28: APT spectrum of 3-O- [ $\alpha$ -L-fucopyranosyl (1 $\rightarrow$ 2)- $\beta$ -D-glucopyranosyl (1 $\rightarrow$ 3)- $\alpha$ -L-arabinopyranosyl] jubogenin (christinin A)

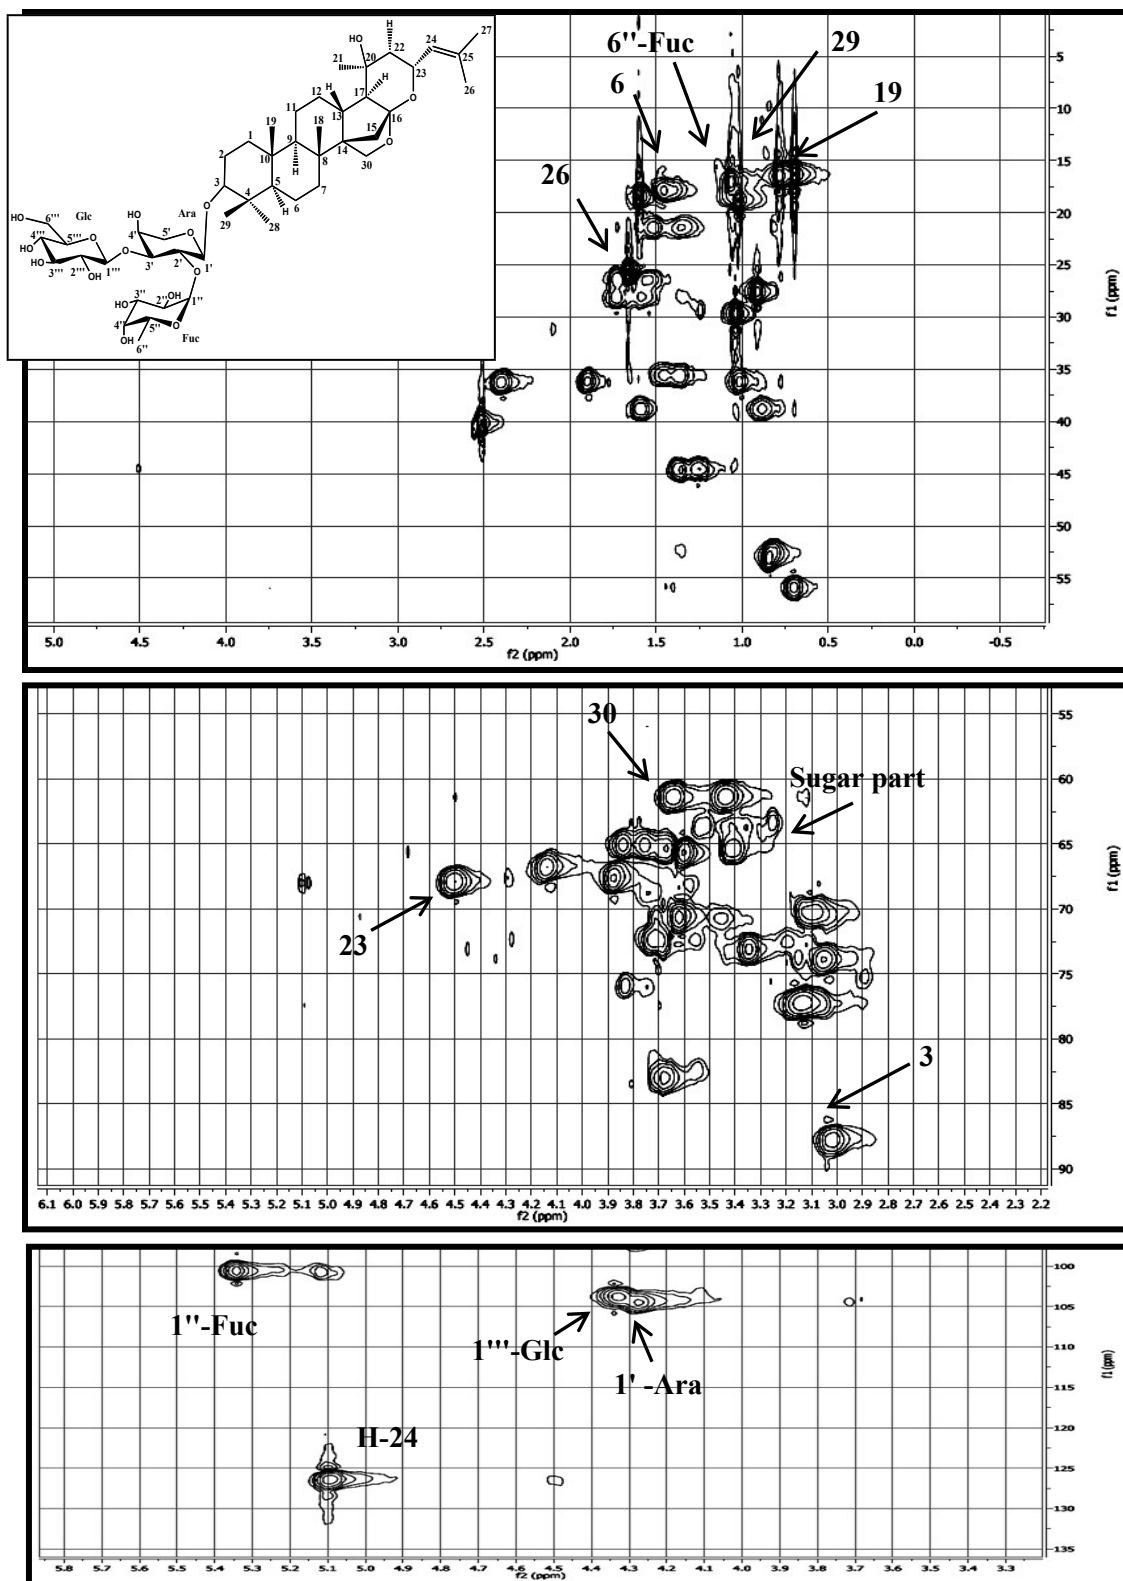

Figure S29: HSQC spectrum of 3-*O*- [ $\alpha$ -L-fucopyranosyl (1 $\rightarrow$ 2)- $\beta$ -D-glucopyranosyl (1 $\rightarrow$ 3)- $\alpha$ -L-arabinopyranosyl] jujubogenin (christinin A)
